# Supplementary material for: Genetic analysis of ocular tumour-associated genes using large genomic datasets: insights into selection constraints and variant representation in the population
Source: HighWire-hosted journal article supplement (doi:10.1136/bmjophth-2023-001565), 2024-02-01
Supplement: bmjophth-2023-001565supp004_data_supplement.pdf [file bmjophth-2023-001565supp004_data_supplement.pdf]

**Supplementary Table 4: PANTHER Overrepresentation Test (Haploinsufficient Lung Cancer-Associated Genes)**

| Analysis Type:                                                                                  |                                |                            |                                  | PANTHER Overrepresentation Test (Released 20231017)                   |                                         |                                     |                             |
|-------------------------------------------------------------------------------------------------|--------------------------------|----------------------------|----------------------------------|-----------------------------------------------------------------------|-----------------------------------------|-------------------------------------|-----------------------------|
| Annotation Version and Release Date:                                                            |                                |                            |                                  | GO Ontology database DOI: 10.5281/zenodo.10536401 Released 2024-01-17 |                                         |                                     |                             |
| Analyzed List:                                                                                  |                                |                            |                                  | Client Text Box Input (Homo sapiens)                                  |                                         |                                     |                             |
| Reference List:                                                                                 |                                |                            |                                  | Homo sapiens (all genes in database)                                  |                                         |                                     |                             |
| Test Type:                                                                                      |                                |                            |                                  | FISHER                                                                |                                         |                                     |                             |
| Correction:                                                                                     |                                |                            |                                  | FDR                                                                   |                                         |                                     |                             |
| GO biological process complete                                                                  | Homo sapiens - REFLIST (20592) | Client Text Box Input (28) | Client Text Box Input (expected) | Client Text Box Input (over/under)                                    | Client Text Box Input (fold Enrichment) | Client Text Box Input (raw P-value) | Client Text Box Input (FDR) |
| regulation of Golgi inheritance (GO:0090170)                                                    | 4                              | 2                          | .01                              | +                                                                     | > 100                                   | 2.66E-05                            | 1.45E-03                    |
| trachea formation (GO:0060440)                                                                  | 7                              | 3                          | .01                              | +                                                                     | > 100                                   | 2.67E-07                            | 2.81E-05                    |
| trachea morphogenesis (GO:0060439)                                                              | 11                             | 3                          | .01                              | +                                                                     | > 100                                   | 8.08E-07                            | 7.33E-05                    |
| Bergmann glial cell differentiation (GO:0060020)                                                | 11                             | 3                          | .01                              | +                                                                     | > 100                                   | 8.08E-07                            | 7.29E-05                    |
| anoikis (GO:0043276)                                                                            | 12                             | 3                          | .02                              | +                                                                     | > 100                                   | 1.01E-06                            | 8.94E-05                    |
| ERBB2-ERBB3 signaling pathway (GO:0038133)                                                      | 9                              | 2                          | .01                              | +                                                                     | > 100                                   | 9.71E-05                            | 4.11E-03                    |
| ERBB3 signaling pathway (GO:0038129)                                                            | 9                              | 2                          | .01                              | +                                                                     | > 100                                   | 9.71E-05                            | 4.10E-03                    |
| epithelial cell proliferation involved in prostate gland development (GO:0060767)               | 9                              | 2                          | .01                              | +                                                                     | > 100                                   | 9.71E-05                            | 4.09E-03                    |
| regulation of epithelial cell proliferation involved in prostate gland development (GO:0060768) | 10                             | 2                          | .01                              | +                                                                     | > 100                                   | 1.16E-04                            | 4.81E-03                    |
| negative regulation of fibroblast                                                               | 11                             | 2                          | .01                              | +                                                                     | > 100                                   | 1.37E-04                            | 5.48E-03                    |

|                                                                                                                  |    |   |     |   |       |              |              |
|------------------------------------------------------------------------------------------------------------------|----|---|-----|---|-------|--------------|--------------|
| migration<br>(GO:0010764)                                                                                        |    |   |     |   |       |              |              |
| genitalia<br>morphogenesis<br>(GO:0035112)                                                                       | 12 | 2 | .02 | + | > 100 | 1.60E<br>-04 | 6.26E<br>-03 |
| trachea<br>development<br>(GO:0060438)                                                                           | 19 | 3 | .03 | + | > 100 | 3.39E<br>-06 | 2.59E<br>-04 |
| nucleosome<br>disassembly<br>(GO:0006337)                                                                        | 19 | 3 | .03 | + | > 100 | 3.39E<br>-06 | 2.57E<br>-04 |
| myoblast<br>proliferation<br>(GO:0051450)                                                                        | 13 | 2 | .02 | + | > 100 | 1.85E<br>-04 | 7.09E<br>-03 |
| protein-DNA<br>complex disassembly<br>(GO:0032986)                                                               | 21 | 3 | .03 | + | > 100 | 4.45E<br>-06 | 3.23E<br>-04 |
| layer formation in<br>cerebral cortex<br>(GO:0021819)                                                            | 15 | 2 | .02 | + | 98.06 | 2.39E<br>-04 | 8.92E<br>-03 |
| thyroid gland<br>development<br>(GO:0030878)                                                                     | 31 | 4 | .04 | + | 94.89 | 1.38E<br>-07 | 1.62E<br>-05 |
| insulin-like growth<br>factor receptor<br>signaling pathway<br>(GO:0048009)                                      | 32 | 4 | .04 | + | 91.93 | 1.55E<br>-07 | 1.74E<br>-05 |
| regulation of Golgi<br>organization<br>(GO:1903358)                                                              | 16 | 2 | .02 | + | 91.93 | 2.68E<br>-04 | 9.70E<br>-03 |
| thymus<br>development<br>(GO:0048538)                                                                            | 50 | 6 | .07 | + | 88.25 | 1.10E<br>-10 | 4.07E<br>-08 |
| positive regulation<br>of nitric-oxide<br>synthase activity<br>(GO:0051000)                                      | 17 | 2 | .02 | + | 86.52 | 3.00E<br>-04 | 1.07E<br>-02 |
| regulation of<br>nucleotide-excision<br>repair (GO:2000819)                                                      | 28 | 3 | .04 | + | 78.80 | 9.83E<br>-06 | 6.43E<br>-04 |
| regulation of<br>oxidative stress-<br>induced neuron<br>intrinsic apoptotic<br>signaling pathway<br>(GO:1903376) | 19 | 2 | .03 | + | 77.41 | 3.67E<br>-04 | 1.25E<br>-02 |
| ERK1 and ERK2<br>cascade<br>(GO:0070371)                                                                         | 49 | 5 | .07 | + | 75.04 | 9.56E<br>-09 | 1.68E<br>-06 |
| regulation of early<br>endosome to late                                                                          | 20 | 2 | .03 | + | 73.54 | 4.04E<br>-04 | 1.34E<br>-02 |

|                                                                                                            |    |   |     |   |       |              |              |
|------------------------------------------------------------------------------------------------------------|----|---|-----|---|-------|--------------|--------------|
| endosome transport<br>(GO:2000641)                                                                         |    |   |     |   |       |              |              |
| animal organ<br>formation<br>(GO:0048645)                                                                  | 40 | 4 | .05 | + | 73.54 | 3.56E<br>-07 | 3.64E<br>-05 |
| stress fiber assembly<br>(GO:0043149)                                                                      | 20 | 2 | .03 | + | 73.54 | 4.04E<br>-04 | 1.34E<br>-02 |
| labyrinthine layer<br>blood vessel<br>development<br>(GO:0060716)                                          | 20 | 2 | .03 | + | 73.54 | 4.04E<br>-04 | 1.34E<br>-02 |
| contractile actin<br>filament bundle<br>assembly<br>(GO:0030038)                                           | 20 | 2 | .03 | + | 73.54 | 4.04E<br>-04 | 1.33E<br>-02 |
| negative regulation<br>of endothelial cell<br>apoptotic process<br>(GO:2000352)                            | 31 | 3 | .04 | + | 71.17 | 1.30E<br>-05 | 8.15E<br>-04 |
| placenta blood<br>vessel development<br>(GO:0060674)                                                       | 31 | 3 | .04 | + | 71.17 | 1.30E<br>-05 | 8.12E<br>-04 |
| ERBB signaling<br>pathway<br>(GO:0038127)                                                                  | 65 | 6 | .09 | + | 67.89 | 4.77E<br>-10 | 1.30E<br>-07 |
| positive regulation<br>of myoblast<br>differentiation<br>(GO:0045663)                                      | 44 | 4 | .06 | + | 66.86 | 5.08E<br>-07 | 4.93E<br>-05 |
| organ induction<br>(GO:0001759)                                                                            | 22 | 2 | .03 | + | 66.86 | 4.82E<br>-04 | 1.55E<br>-02 |
| regulation of<br>extrinsic apoptotic<br>signaling pathway in<br>absence of ligand<br>(GO:2001239)          | 46 | 4 | .06 | + | 63.95 | 6.00E<br>-07 | 5.72E<br>-05 |
| ERBB2 signaling<br>pathway<br>(GO:0038128)                                                                 | 23 | 2 | .03 | + | 63.95 | 5.23E<br>-04 | 1.66E<br>-02 |
| negative regulation<br>of cellular<br>senescence<br>(GO:2000773)                                           | 24 | 2 | .03 | + | 61.29 | 5.66E<br>-04 | 1.77E<br>-02 |
| male genitalia<br>development<br>(GO:0030539)                                                              | 24 | 2 | .03 | + | 61.29 | 5.66E<br>-04 | 1.76E<br>-02 |
| negative regulation<br>of extrinsic apoptotic<br>signaling pathway in<br>absence of ligand<br>(GO:2001240) | 36 | 3 | .05 | + | 61.29 | 1.98E<br>-05 | 1.15E<br>-03 |

|                                                                              |    |   |     |   |       |          |          |
|------------------------------------------------------------------------------|----|---|-----|---|-------|----------|----------|
| regulation of G0 to G1 transition (GO:0070316)                               | 36 | 3 | .05 | + | 61.29 | 1.98E-05 | 1.15E-03 |
| negative regulation of signal transduction in absence of ligand (GO:1901099) | 36 | 3 | .05 | + | 61.29 | 1.98E-05 | 1.15E-03 |
| epidermal growth factor receptor signaling pathway (GO:0007173)              | 49 | 4 | .07 | + | 60.03 | 7.61E-07 | 6.94E-05 |
| lung morphogenesis (GO:0060425)                                              | 50 | 4 | .07 | + | 58.83 | 8.21E-07 | 7.36E-05 |
| cardiac muscle cell proliferation (GO:0060038)                               | 25 | 2 | .03 | + | 58.83 | 6.11E-04 | 1.87E-02 |
| response to muscle stretch (GO:0035994)                                      | 25 | 2 | .03 | + | 58.83 | 6.11E-04 | 1.86E-02 |
| androgen receptor signaling pathway (GO:0030521)                             | 25 | 2 | .03 | + | 58.83 | 6.11E-04 | 1.86E-02 |
| regulation of fibroblast migration (GO:0010762)                              | 38 | 3 | .05 | + | 58.06 | 2.31E-05 | 1.28E-03 |
| lung epithelium development (GO:0060428)                                     | 39 | 3 | .05 | + | 56.57 | 2.48E-05 | 1.37E-03 |
| lung epithelial cell differentiation (GO:0060487)                            | 26 | 2 | .04 | + | 56.57 | 6.58E-04 | 1.98E-02 |
| lung cell differentiation (GO:0060479)                                       | 26 | 2 | .04 | + | 56.57 | 6.58E-04 | 1.97E-02 |
| regulation of nitric-oxide synthase activity (GO:0050999)                    | 26 | 2 | .04 | + | 56.57 | 6.58E-04 | 1.97E-02 |
| metanephros morphogenesis (GO:0003338)                                       | 26 | 2 | .04 | + | 56.57 | 6.58E-04 | 1.97E-02 |
| epithelial tube branching involved in lung morphogenesis (GO:0060441)        | 27 | 2 | .04 | + | 54.48 | 7.06E-04 | 2.09E-02 |
| regulation of oxidative stress-induced intrinsic apoptotic signaling         | 42 | 3 | .06 | + | 52.53 | 3.06E-05 | 1.64E-03 |

|                                                                                                                    |    |   |     |   |       |              |              |
|--------------------------------------------------------------------------------------------------------------------|----|---|-----|---|-------|--------------|--------------|
| pathway<br>(GO:1902175)                                                                                            |    |   |     |   |       |              |              |
| telencephalon glial<br>cell migration<br>(GO:0022030)                                                              | 28 | 2 | .04 | + | 52.53 | 7.56E<br>-04 | 2.20E<br>-02 |
| positive regulation<br>of monooxygenase<br>activity<br>(GO:0032770)                                                | 28 | 2 | .04 | + | 52.53 | 7.56E<br>-04 | 2.20E<br>-02 |
| positive regulation<br>of protein tyrosine<br>kinase activity<br>(GO:0061098)                                      | 28 | 2 | .04 | + | 52.53 | 7.56E<br>-04 | 2.19E<br>-02 |
| cerebral cortex radial<br>glia-guided<br>migration<br>(GO:0021801)                                                 | 28 | 2 | .04 | + | 52.53 | 7.56E<br>-04 | 2.19E<br>-02 |
| Schwann cell<br>development<br>(GO:0014044)                                                                        | 43 | 3 | .06 | + | 51.31 | 3.27E<br>-05 | 1.71E<br>-03 |
| positive regulation<br>of oxidoreductase<br>activity<br>(GO:0051353)                                               | 43 | 3 | .06 | + | 51.31 | 3.27E<br>-05 | 1.71E<br>-03 |
| negative regulation<br>of oxidative stress-<br>induced intrinsic<br>apoptotic signaling<br>pathway<br>(GO:1902176) | 29 | 2 | .04 | + | 50.72 | 8.07E<br>-04 | 2.29E<br>-02 |
| regulation of axon<br>regeneration<br>(GO:0048679)                                                                 | 29 | 2 | .04 | + | 50.72 | 8.07E<br>-04 | 2.29E<br>-02 |
| regulation of animal<br>organ formation<br>(GO:0003156)                                                            | 29 | 2 | .04 | + | 50.72 | 8.07E<br>-04 | 2.29E<br>-02 |
| positive regulation<br>of G1/S transition of<br>mitotic cell cycle<br>(GO:1900087)                                 | 44 | 3 | .06 | + | 50.14 | 3.49E<br>-05 | 1.78E<br>-03 |
| positive regulation<br>of glucose<br>transmembrane<br>transport<br>(GO:0010828)                                    | 44 | 3 | .06 | + | 50.14 | 3.49E<br>-05 | 1.77E<br>-03 |
| sister chromatid<br>cohesion<br>(GO:0007062)                                                                       | 45 | 3 | .06 | + | 49.03 | 3.72E<br>-05 | 1.89E<br>-03 |
| positive regulation<br>of extracellular                                                                            | 30 | 2 | .04 | + | 49.03 | 8.60E<br>-04 | 2.42E<br>-02 |

|                                                                                                   |    |   |     |   |       |          |          |
|---------------------------------------------------------------------------------------------------|----|---|-----|---|-------|----------|----------|
| matrix organization (GO:1903055)                                                                  |    |   |     |   |       |          |          |
| positive regulation of signaling receptor activity (GO:2000273)                                   | 30 | 2 | .04 | + | 49.03 | 8.60E-04 | 2.41E-02 |
| negative regulation of epithelial cell apoptotic process (GO:1904036)                             | 61 | 4 | .08 | + | 48.22 | 1.74E-06 | 1.45E-04 |
| positive regulation of transforming growth factor beta receptor signaling pathway (GO:0030511)    | 31 | 2 | .04 | + | 47.45 | 9.15E-04 | 2.54E-02 |
| positive regulation of cellular response to transforming growth factor beta stimulus (GO:1903846) | 31 | 2 | .04 | + | 47.45 | 9.15E-04 | 2.54E-02 |
| prostate gland development (GO:0030850)                                                           | 47 | 3 | .06 | + | 46.94 | 4.21E-05 | 2.08E-03 |
| labyrinthine layer development (GO:0060711)                                                       | 47 | 3 | .06 | + | 46.94 | 4.21E-05 | 2.08E-03 |
| positive regulation of stem cell proliferation (GO:2000648)                                       | 48 | 3 | .07 | + | 45.96 | 4.47E-05 | 2.18E-03 |
| Schwann cell differentiation (GO:0014037)                                                         | 48 | 3 | .07 | + | 45.96 | 4.47E-05 | 2.17E-03 |
| T cell differentiation in thymus (GO:0033077)                                                     | 64 | 4 | .09 | + | 45.96 | 2.09E-06 | 1.69E-04 |
| regulation of neuron projection regeneration (GO:0070570)                                         | 32 | 2 | .04 | + | 45.96 | 9.71E-04 | 2.66E-02 |
| protein localization to cell surface (GO:0034394)                                                 | 32 | 2 | .04 | + | 45.96 | 9.71E-04 | 2.65E-02 |
| regulation of mitophagy (GO:1901524)                                                              | 33 | 2 | .04 | + | 44.57 | 1.03E-03 | 2.80E-02 |
| astrocyte differentiation (GO:0048708)                                                            | 66 | 4 | .09 | + | 44.57 | 2.34E-06 | 1.87E-04 |

|                                                                         |     |   |     |   |       |          |          |
|-------------------------------------------------------------------------|-----|---|-----|---|-------|----------|----------|
| developmental induction (GO:0031128)                                    | 33  | 2 | .04 | + | 44.57 | 1.03E-03 | 2.79E-02 |
| hair follicle morphogenesis (GO:0031069)                                | 33  | 2 | .04 | + | 44.57 | 1.03E-03 | 2.79E-02 |
| negative regulation of macroautophagy (GO:0016242)                      | 33  | 2 | .04 | + | 44.57 | 1.03E-03 | 2.78E-02 |
| long-term synaptic potentiation (GO:0060291)                            | 50  | 3 | .07 | + | 44.13 | 5.02E-05 | 2.41E-03 |
| hematopoietic or lymphoid organ development (GO:0048534)                | 100 | 6 | .14 | + | 44.13 | 5.50E-09 | 1.06E-06 |
| negative regulation of osteoclast differentiation (GO:0045671)          | 34  | 2 | .05 | + | 43.26 | 1.09E-03 | 2.91E-02 |
| lipopolysaccharide-mediated signaling pathway (GO:0031663)              | 34  | 2 | .05 | + | 43.26 | 1.09E-03 | 2.90E-02 |
| cardiac muscle tissue growth (GO:0055017)                               | 34  | 2 | .05 | + | 43.26 | 1.09E-03 | 2.90E-02 |
| regulation of endothelial cell apoptotic process (GO:2000351)           | 52  | 3 | .07 | + | 42.43 | 5.61E-05 | 2.64E-03 |
| regulation of stress-activated MAPK cascade (GO:0032872)                | 35  | 2 | .05 | + | 42.02 | 1.15E-03 | 3.01E-02 |
| proximal/distal pattern formation (GO:0009954)                          | 35  | 2 | .05 | + | 42.02 | 1.15E-03 | 3.01E-02 |
| positive regulation of telomere maintenance via telomerase (GO:0032212) | 35  | 2 | .05 | + | 42.02 | 1.15E-03 | 3.00E-02 |
| positive T cell selection (GO:0043368)                                  | 35  | 2 | .05 | + | 42.02 | 1.15E-03 | 3.00E-02 |
| face development (GO:0060324)                                           | 53  | 3 | .07 | + | 41.63 | 5.92E-05 | 2.76E-03 |
| regulation of morphogenesis of a                                        | 54  | 3 | .07 | + | 40.86 | 6.25E-05 | 2.88E-03 |

|                                                                    |    |   |     |   |       |          |          |
|--------------------------------------------------------------------|----|---|-----|---|-------|----------|----------|
| branching structure (GO:0060688)                                   |    |   |     |   |       |          |          |
| heart growth (GO:0060419)                                          | 36 | 2 | .05 | + | 40.86 | 1.21E-03 | 3.11E-02 |
| positive regulation of animal organ morphogenesis (GO:0110110)     | 36 | 2 | .05 | + | 40.86 | 1.21E-03 | 3.11E-02 |
| smooth muscle cell differentiation (GO:0051145)                    | 36 | 2 | .05 | + | 40.86 | 1.21E-03 | 3.10E-02 |
| response to pain (GO:0048265)                                      | 36 | 2 | .05 | + | 40.86 | 1.21E-03 | 3.10E-02 |
| regulation of phospholipase C activity (GO:1900274)                | 36 | 2 | .05 | + | 40.86 | 1.21E-03 | 3.09E-02 |
| striated muscle cell proliferation (GO:0014855)                    | 36 | 2 | .05 | + | 40.86 | 1.21E-03 | 3.09E-02 |
| positive regulation of glucose import (GO:0046326)                 | 36 | 2 | .05 | + | 40.86 | 1.21E-03 | 3.08E-02 |
| endothelial cell migration (GO:0043542)                            | 73 | 4 | .10 | + | 40.30 | 3.44E-06 | 2.58E-04 |
| peptidyl-threonine phosphorylation (GO:0018107)                    | 55 | 3 | .07 | + | 40.11 | 6.58E-05 | 3.02E-03 |
| cerebral cortex radially oriented cell migration (GO:0021799)      | 37 | 2 | .05 | + | 39.75 | 1.28E-03 | 3.23E-02 |
| epidermis morphogenesis (GO:0048730)                               | 37 | 2 | .05 | + | 39.75 | 1.28E-03 | 3.23E-02 |
| positive regulation of morphogenesis of an epithelium (GO:1905332) | 37 | 2 | .05 | + | 39.75 | 1.28E-03 | 3.22E-02 |
| regulation of myoblast differentiation (GO:0045661)                | 75 | 4 | .10 | + | 39.22 | 3.81E-06 | 2.81E-04 |
| epithelial cell apoptotic process (GO:1904019)                     | 57 | 3 | .08 | + | 38.71 | 7.29E-05 | 3.25E-03 |
| endothelial cell proliferation (GO:0001935)                        | 38 | 2 | .05 | + | 38.71 | 1.34E-03 | 3.36E-02 |



|                                                                                   |    |   |     |   |       |          |          |
|-----------------------------------------------------------------------------------|----|---|-----|---|-------|----------|----------|
| cellular response to cadmium ion (GO:0071276)                                     | 38 | 2 | .05 | + | 38.71 | 1.34E-03 | 3.36E-02 |
| regulation of ubiquitin-protein transferase activity (GO:0051438)                 | 38 | 2 | .05 | + | 38.71 | 1.34E-03 | 3.35E-02 |
| spleen development (GO:0048536)                                                   | 38 | 2 | .05 | + | 38.71 | 1.34E-03 | 3.35E-02 |
| positive regulation of telomere maintenance via telomere lengthening (GO:1904358) | 38 | 2 | .05 | + | 38.71 | 1.34E-03 | 3.34E-02 |
| transcription initiation-coupled chromatin remodeling (GO:0045815)                | 38 | 2 | .05 | + | 38.71 | 1.34E-03 | 3.34E-02 |
| negative regulation of Notch signaling pathway (GO:0045746)                       | 39 | 2 | .05 | + | 37.71 | 1.41E-03 | 3.47E-02 |
| regulation of monooxygenase activity (GO:0032768)                                 | 39 | 2 | .05 | + | 37.71 | 1.41E-03 | 3.47E-02 |
| regulation of cell migration involved in sprouting angiogenesis (GO:0090049)      | 39 | 2 | .05 | + | 37.71 | 1.41E-03 | 3.46E-02 |
| regulation of stress-activated protein kinase signaling cascade (GO:0070302)      | 39 | 2 | .05 | + | 37.71 | 1.41E-03 | 3.46E-02 |
| positive regulation of cell cycle G1/S phase transition (GO:1902808)              | 59 | 3 | .08 | + | 37.39 | 8.04E-05 | 3.52E-03 |
| positive regulation of gene expression, epigenetic (GO:0141137)                   | 40 | 2 | .05 | + | 36.77 | 1.48E-03 | 3.61E-02 |
| response to cadmium ion (GO:0046686)                                              | 61 | 3 | .08 | + | 36.17 | 8.84E-05 | 3.81E-03 |
| mammary gland epithelium                                                          | 61 | 3 | .08 | + | 36.17 | 8.84E-05 | 3.79E-03 |

|                                                                                    |    |   |     |   |       |          |          |
|------------------------------------------------------------------------------------|----|---|-----|---|-------|----------|----------|
| development<br>(GO:0061180)                                                        |    |   |     |   |       |          |          |
| regulation of autophagy of mitochondrion<br>(GO:1903146)                           | 41 | 2 | .06 | + | 35.87 | 1.55E-03 | 3.75E-02 |
| regulation of protein localization to cell surface<br>(GO:2000008)                 | 41 | 2 | .06 | + | 35.87 | 1.55E-03 | 3.75E-02 |
| positive regulation of glucose metabolic process<br>(GO:0010907)                   | 41 | 2 | .06 | + | 35.87 | 1.55E-03 | 3.74E-02 |
| negative regulation of gliogenesis<br>(GO:0014014)                                 | 42 | 2 | .06 | + | 35.02 | 1.62E-03 | 3.91E-02 |
| urogenital system development<br>(GO:0001655)                                      | 64 | 3 | .09 | + | 34.47 | 1.01E-04 | 4.24E-03 |
| T cell costimulation<br>(GO:0031295)                                               | 43 | 2 | .06 | + | 34.21 | 1.70E-03 | 4.08E-02 |
| positive regulation of substrate adhesion-dependent cell spreading<br>(GO:1900026) | 43 | 2 | .06 | + | 34.21 | 1.70E-03 | 4.07E-02 |
| peptidyl-threonine modification<br>(GO:0018210)                                    | 65 | 3 | .09 | + | 33.94 | 1.06E-04 | 4.42E-03 |
| regulation of morphogenesis of an epithelium<br>(GO:1905330)                       | 65 | 3 | .09 | + | 33.94 | 1.06E-04 | 4.41E-03 |
| muscle cell proliferation<br>(GO:0033002)                                          | 44 | 2 | .06 | + | 33.43 | 1.77E-03 | 4.24E-02 |
| lymphocyte costimulation<br>(GO:0031294)                                           | 44 | 2 | .06 | + | 33.43 | 1.77E-03 | 4.23E-02 |
| T cell homeostasis<br>(GO:0043029)                                                 | 44 | 2 | .06 | + | 33.43 | 1.77E-03 | 4.22E-02 |
| cerebellum morphogenesis<br>(GO:0021587)                                           | 45 | 2 | .06 | + | 32.69 | 1.85E-03 | 4.39E-02 |
| cellular response to vascular endothelial growth factor stimulus<br>(GO:0035924)   | 45 | 2 | .06 | + | 32.69 | 1.85E-03 | 4.38E-02 |

|                                                                         |     |   |     |   |       |          |          |
|-------------------------------------------------------------------------|-----|---|-----|---|-------|----------|----------|
| regulation of mitotic metaphase/anaphase transition (GO:0030071)        | 90  | 4 | .12 | + | 32.69 | 7.62E-06 | 5.21E-04 |
| positive regulation of mitotic cell cycle phase transition (GO:1901992) | 91  | 4 | .12 | + | 32.33 | 7.95E-06 | 5.39E-04 |
| regulation of oxidoreductase activity (GO:0051341)                      | 69  | 3 | .09 | + | 31.98 | 1.26E-04 | 5.16E-03 |
| positive regulation of neuron apoptotic process (GO:0043525)            | 69  | 3 | .09 | + | 31.98 | 1.26E-04 | 5.15E-03 |
| insulin receptor signaling pathway (GO:0008286)                         | 69  | 3 | .09 | + | 31.98 | 1.26E-04 | 5.13E-03 |
| regulation of cellular senescence (GO:2000772)                          | 46  | 2 | .06 | + | 31.98 | 1.93E-03 | 4.55E-02 |
| response to epidermal growth factor (GO:0070849)                        | 46  | 2 | .06 | + | 31.98 | 1.93E-03 | 4.55E-02 |
| regulation of myelination (GO:0031641)                                  | 46  | 2 | .06 | + | 31.98 | 1.93E-03 | 4.54E-02 |
| endodermal cell differentiation (GO:0035987)                            | 46  | 2 | .06 | + | 31.98 | 1.93E-03 | 4.53E-02 |
| regulation of long-term synaptic potentiation (GO:1900271)              | 46  | 2 | .06 | + | 31.98 | 1.93E-03 | 4.53E-02 |
| substrate adhesion-dependent cell spreading (GO:0034446)                | 46  | 2 | .06 | + | 31.98 | 1.93E-03 | 4.52E-02 |
| cellular response to dopamine (GO:1903351)                              | 46  | 2 | .06 | + | 31.98 | 1.93E-03 | 4.51E-02 |
| T cell receptor signaling pathway (GO:0050852)                          | 116 | 5 | .16 | + | 31.70 | 5.65E-07 | 5.41E-05 |
| regulation of metaphase/anaphase transition of cell cycle (GO:1902099)  | 93  | 4 | .13 | + | 31.63 | 8.64E-06 | 5.78E-04 |

|                                                                      |     |   |     |   |       |          |          |
|----------------------------------------------------------------------|-----|---|-----|---|-------|----------|----------|
| lymphocyte homeostasis (GO:0002260)                                  | 70  | 3 | .10 | + | 31.52 | 1.31E-04 | 5.25E-03 |
| pancreas development (GO:0031016)                                    | 70  | 3 | .10 | + | 31.52 | 1.31E-04 | 5.24E-03 |
| regulation of G1/S transition of mitotic cell cycle (GO:2000045)     | 164 | 7 | .22 | + | 31.39 | 2.44E-09 | 5.55E-07 |
| regulation of cell cycle G1/S phase transition (GO:1902806)          | 191 | 8 | .26 | + | 30.80 | 1.72E-10 | 5.70E-08 |
| hindbrain morphogenesis (GO:0021575)                                 | 48  | 2 | .07 | + | 30.64 | 2.09E-03 | 4.85E-02 |
| positive regulation of stem cell population maintenance (GO:1902459) | 48  | 2 | .07 | + | 30.64 | 2.09E-03 | 4.85E-02 |
| T cell selection (GO:0045058)                                        | 48  | 2 | .07 | + | 30.64 | 2.09E-03 | 4.84E-02 |
| genitalia development (GO:0048806)                                   | 48  | 2 | .07 | + | 30.64 | 2.09E-03 | 4.83E-02 |
| negative regulation of cold-induced thermogenesis (GO:0120163)       | 48  | 2 | .07 | + | 30.64 | 2.09E-03 | 4.82E-02 |
| cellular response to nerve growth factor stimulus (GO:1990090)       | 48  | 2 | .07 | + | 30.64 | 2.09E-03 | 4.82E-02 |
| glial cell migration (GO:0008347)                                    | 48  | 2 | .07 | + | 30.64 | 2.09E-03 | 4.81E-02 |
| response to dopamine (GO:1903350)                                    | 48  | 2 | .07 | + | 30.64 | 2.09E-03 | 4.80E-02 |
| positive regulation of TOR signaling (GO:0032008)                    | 72  | 3 | .10 | + | 30.64 | 1.42E-04 | 5.64E-03 |
| positive regulation of mitotic cell cycle (GO:0045931)               | 122 | 5 | .17 | + | 30.14 | 7.18E-07 | 6.64E-05 |
| cerebral cortex cell migration (GO:0021795)                          | 49  | 2 | .07 | + | 30.02 | 2.18E-03 | 4.97E-02 |
| cellular response to catecholamine                                   | 49  | 2 | .07 | + | 30.02 | 2.18E-03 | 4.96E-02 |

|                                                                              |     |   |     |   |       |              |              |
|------------------------------------------------------------------------------|-----|---|-----|---|-------|--------------|--------------|
| stimulus<br>(GO:0071870)                                                     |     |   |     |   |       |              |              |
| cellular response to<br>monoamine stimulus<br>(GO:0071868)                   | 49  | 2 | .07 | + | 30.02 | 2.18E<br>-03 | 4.96E<br>-02 |
| canonical NF-kappaB<br>signal transduction<br>(GO:0007249)                   | 49  | 2 | .07 | + | 30.02 | 2.18E<br>-03 | 4.95E<br>-02 |
| digestive tract<br>morphogenesis<br>(GO:0048546)                             | 49  | 2 | .07 | + | 30.02 | 2.18E<br>-03 | 4.94E<br>-02 |
| negative regulation<br>of epithelial cell<br>differentiation<br>(GO:0030857) | 49  | 2 | .07 | + | 30.02 | 2.18E<br>-03 | 4.94E<br>-02 |
| regulation of glucose<br>transmembrane<br>transport<br>(GO:0010827)          | 75  | 3 | .10 | + | 29.42 | 1.59E<br>-04 | 6.24E<br>-03 |
| epithelial cell<br>proliferation<br>(GO:0050673)                             | 178 | 7 | .24 | + | 28.92 | 4.22E<br>-09 | 8.69E<br>-07 |
| regulation of<br>epithelial cell<br>apoptotic process<br>(GO:1904035)        | 103 | 4 | .14 | + | 28.56 | 1.27E<br>-05 | 8.00E<br>-04 |
| epithelial cell<br>migration<br>(GO:0010631)                                 | 104 | 4 | .14 | + | 28.29 | 1.32E<br>-05 | 8.16E<br>-04 |
| regulation of sister<br>chromatid<br>segregation<br>(GO:0033045)             | 105 | 4 | .14 | + | 28.02 | 1.37E<br>-05 | 8.43E<br>-04 |
| alpha-beta T cell<br>differentiation<br>(GO:0046632)                         | 79  | 3 | .11 | + | 27.93 | 1.85E<br>-04 | 7.08E<br>-03 |
| positive regulation<br>of axonogenesis<br>(GO:0050772)                       | 80  | 3 | .11 | + | 27.58 | 1.92E<br>-04 | 7.32E<br>-03 |
| epithelium migration<br>(GO:0090132)                                         | 107 | 4 | .15 | + | 27.49 | 1.47E<br>-05 | 8.99E<br>-04 |
| glial cell<br>differentiation<br>(GO:0010001)                                | 218 | 8 | .30 | + | 26.99 | 4.73E<br>-10 | 1.31E<br>-07 |
| regulation of stem<br>cell proliferation<br>(GO:0072091)                     | 83  | 3 | .11 | + | 26.58 | 2.13E<br>-04 | 8.03E<br>-03 |
| positive regulation<br>of cell cycle phase<br>transition<br>(GO:1901989)     | 111 | 4 | .15 | + | 26.50 | 1.70E<br>-05 | 1.01E<br>-03 |

|                                                                                                  |     |   |     |   |       |          |          |
|--------------------------------------------------------------------------------------------------|-----|---|-----|---|-------|----------|----------|
| immune system development (GO:0002520)                                                           | 167 | 6 | .23 | + | 26.42 | 1.03E-07 | 1.29E-05 |
| positive regulation of smooth muscle cell proliferation (GO:0048661)                             | 85  | 3 | .12 | + | 25.96 | 2.28E-04 | 8.55E-03 |
| positive regulation of Wnt signaling pathway (GO:0030177)                                        | 142 | 5 | .19 | + | 25.90 | 1.48E-06 | 1.25E-04 |
| tissue migration (GO:0090130)                                                                    | 114 | 4 | .16 | + | 25.80 | 1.88E-05 | 1.10E-03 |
| positive regulation of double-strand break repair (GO:2000781)                                   | 86  | 3 | .12 | + | 25.65 | 2.35E-04 | 8.82E-03 |
| embryonic placenta development (GO:0001892)                                                      | 87  | 3 | .12 | + | 25.36 | 2.43E-04 | 9.01E-03 |
| associative learning (GO:0008306)                                                                | 88  | 3 | .12 | + | 25.07 | 2.51E-04 | 9.28E-03 |
| negative regulation of protein modification by small protein conjugation or removal (GO:1903321) | 88  | 3 | .12 | + | 25.07 | 2.51E-04 | 9.26E-03 |
| positive regulation of binding (GO:0051099)                                                      | 118 | 4 | .16 | + | 24.93 | 2.14E-05 | 1.22E-03 |
| negative regulation of protein serine/threonine kinase activity (GO:0071901)                     | 89  | 3 | .12 | + | 24.79 | 2.60E-04 | 9.49E-03 |
| peripheral nervous system development (GO:0007422)                                               | 90  | 3 | .12 | + | 24.51 | 2.68E-04 | 9.73E-03 |
| negative regulation of autophagy (GO:0010507)                                                    | 90  | 3 | .12 | + | 24.51 | 2.68E-04 | 9.71E-03 |
| regulation of fibroblast proliferation (GO:0048145)                                              | 91  | 3 | .12 | + | 24.24 | 2.77E-04 | 9.97E-03 |
| regulation of T cell differentiation (GO:0045580)                                                | 183 | 6 | .25 | + | 24.11 | 1.74E-07 | 1.93E-05 |

|                                                                             |     |   |     |   |       |          |          |
|-----------------------------------------------------------------------------|-----|---|-----|---|-------|----------|----------|
| negative regulation of post-translational protein modification (GO:1901874) | 92  | 3 | .13 | + | 23.98 | 2.85E-04 | 1.03E-02 |
| regulation of stress fiber assembly (GO:0051492)                            | 92  | 3 | .13 | + | 23.98 | 2.85E-04 | 1.02E-02 |
| regulation of blood vessel endothelial cell migration (GO:0043535)          | 92  | 3 | .13 | + | 23.98 | 2.85E-04 | 1.02E-02 |
| gliogenesis (GO:0042063)                                                    | 277 | 9 | .38 | + | 23.89 | 9.19E-11 | 3.59E-08 |
| glial cell development (GO:0021782)                                         | 128 | 4 | .17 | + | 22.98 | 2.92E-05 | 1.58E-03 |
| negative regulation of extrinsic apoptotic signaling pathway (GO:2001237)   | 97  | 3 | .13 | + | 22.75 | 3.32E-04 | 1.17E-02 |
| leukocyte homeostasis (GO:0001776)                                          | 97  | 3 | .13 | + | 22.75 | 3.32E-04 | 1.17E-02 |
| positive regulation of protein localization to nucleus (GO:1900182)         | 97  | 3 | .13 | + | 22.75 | 3.32E-04 | 1.16E-02 |
| antigen receptor-mediated signaling pathway (GO:0050851)                    | 162 | 5 | .22 | + | 22.70 | 2.77E-06 | 2.17E-04 |
| positive regulation of DNA repair (GO:0045739)                              | 130 | 4 | .18 | + | 22.63 | 3.09E-05 | 1.65E-03 |
| regulation of Notch signaling pathway (GO:0008593)                          | 98  | 3 | .13 | + | 22.51 | 3.42E-04 | 1.19E-02 |
| regulation of chromosome segregation (GO:0051983)                           | 131 | 4 | .18 | + | 22.46 | 3.18E-05 | 1.69E-03 |
| regulation of double-strand break repair (GO:2000779)                       | 132 | 4 | .18 | + | 22.29 | 3.28E-05 | 1.71E-03 |
| endocrine system development (GO:0035270)                                   | 132 | 4 | .18 | + | 22.29 | 3.28E-05 | 1.70E-03 |
| regulation of dendrite                                                      | 99  | 3 | .13 | + | 22.29 | 3.52E-04 | 1.21E-02 |

|                                                                         |     |    |     |   |       |              |              |
|-------------------------------------------------------------------------|-----|----|-----|---|-------|--------------|--------------|
| development<br>(GO:0050773)                                             |     |    |     |   |       |              |              |
| regulation of Wnt<br>signaling pathway<br>(GO:0030111)                  | 336 | 10 | .46 | + | 21.89 | 1.56E<br>-11 | 1.19E<br>-08 |
| regulation of<br>actomyosin structure<br>organization<br>(GO:0110020)   | 102 | 3  | .14 | + | 21.63 | 3.83E<br>-04 | 1.30E<br>-02 |
| organ growth<br>(GO:0035265)                                            | 102 | 3  | .14 | + | 21.63 | 3.83E<br>-04 | 1.30E<br>-02 |
| regulation of actin<br>filament bundle<br>assembly<br>(GO:0032231)      | 104 | 3  | .14 | + | 21.21 | 4.05E<br>-04 | 1.33E<br>-02 |
| oogenesis<br>(GO:0048477)                                               | 104 | 3  | .14 | + | 21.21 | 4.05E<br>-04 | 1.33E<br>-02 |
| regulation of smooth<br>muscle cell<br>proliferation<br>(GO:0048660)    | 139 | 4  | .19 | + | 21.16 | 3.99E<br>-05 | 1.99E<br>-03 |
| positive regulation<br>of endothelial cell<br>migration<br>(GO:0010595) | 106 | 3  | .14 | + | 20.81 | 4.28E<br>-04 | 1.40E<br>-02 |
| MAPK cascade<br>(GO:0000165)                                            | 213 | 6  | .29 | + | 20.72 | 4.15E<br>-07 | 4.17E<br>-05 |
| regulation of TOR<br>signaling<br>(GO:0032006)                          | 143 | 4  | .19 | + | 20.57 | 4.44E<br>-05 | 2.17E<br>-03 |
| regulation of<br>lymphocyte<br>differentiation<br>(GO:0045619)          | 215 | 6  | .29 | + | 20.52 | 4.38E<br>-07 | 4.34E<br>-05 |
| nucleosome<br>organization<br>(GO:0034728)                              | 108 | 3  | .15 | + | 20.43 | 4.51E<br>-04 | 1.46E<br>-02 |
| regulation of<br>leukocyte<br>differentiation<br>(GO:1902105)           | 327 | 9  | .44 | + | 20.24 | 3.83E<br>-10 | 1.08E<br>-07 |
| alpha-beta T cell<br>activation<br>(GO:0046631)                         | 109 | 3  | .15 | + | 20.24 | 4.63E<br>-04 | 1.49E<br>-02 |
| T cell differentiation<br>(GO:0030217)                                  | 184 | 5  | .25 | + | 19.98 | 5.08E<br>-06 | 3.64E<br>-04 |
| cellular response to<br>insulin stimulus<br>(GO:0032869)                | 149 | 4  | .20 | + | 19.74 | 5.19E<br>-05 | 2.48E<br>-03 |
| negative regulation<br>of leukocyte                                     | 112 | 3  | .15 | + | 19.70 | 5.00E<br>-04 | 1.60E<br>-02 |



|                                                                           |     |   |     |   |       |              |              |
|---------------------------------------------------------------------------|-----|---|-----|---|-------|--------------|--------------|
| differentiation<br>(GO:1902106)                                           |     |   |     |   |       |              |              |
| developmental cell<br>growth<br>(GO:0048588)                              | 112 | 3 | .15 | + | 19.70 | 5.00E<br>-04 | 1.60E<br>-02 |
| positive regulation<br>of epithelial cell<br>migration<br>(GO:0010634)    | 151 | 4 | .21 | + | 19.48 | 5.46E<br>-05 | 2.59E<br>-03 |
| lung development<br>(GO:0030324)                                          | 189 | 5 | .26 | + | 19.46 | 5.77E<br>-06 | 4.11E<br>-04 |
| regulation of<br>circadian rhythm<br>(GO:0042752)                         | 114 | 3 | .16 | + | 19.35 | 5.26E<br>-04 | 1.67E<br>-02 |
| cell growth<br>(GO:0016049)                                               | 114 | 3 | .16 | + | 19.35 | 5.26E<br>-04 | 1.66E<br>-02 |
| epigenetic regulation<br>of gene expression<br>(GO:0040029)               | 192 | 5 | .26 | + | 19.15 | 6.22E<br>-06 | 4.39E<br>-04 |
| respiratory tube<br>development<br>(GO:0030323)                           | 193 | 5 | .26 | + | 19.05 | 6.37E<br>-06 | 4.48E<br>-04 |
| regulation of<br>extrinsic apoptotic<br>signaling pathway<br>(GO:2001236) | 155 | 4 | .21 | + | 18.98 | 6.03E<br>-05 | 2.80E<br>-03 |
| negative regulation<br>of apoptotic<br>signaling pathway<br>(GO:2001234)  | 234 | 6 | .32 | + | 18.86 | 7.10E<br>-07 | 6.60E<br>-05 |
| negative regulation<br>of hemopoiesis<br>(GO:1903707)                     | 117 | 3 | .16 | + | 18.86 | 5.66E<br>-04 | 1.77E<br>-02 |
| stem cell population<br>maintenance<br>(GO:0019827)                       | 117 | 3 | .16 | + | 18.86 | 5.66E<br>-04 | 1.77E<br>-02 |
| positive regulation<br>of T cell<br>differentiation<br>(GO:0045582)       | 119 | 3 | .16 | + | 18.54 | 5.94E<br>-04 | 1.82E<br>-02 |
| female gamete<br>generation<br>(GO:0007292)                               | 159 | 4 | .22 | + | 18.50 | 6.65E<br>-05 | 3.04E<br>-03 |
| skin epidermis<br>development<br>(GO:0098773)                             | 120 | 3 | .16 | + | 18.39 | 6.08E<br>-04 | 1.86E<br>-02 |
| maintenance of cell<br>number<br>(GO:0098727)                             | 121 | 3 | .16 | + | 18.23 | 6.23E<br>-04 | 1.88E<br>-02 |

|                                                                       |     |   |     |   |       |          |          |
|-----------------------------------------------------------------------|-----|---|-----|---|-------|----------|----------|
| regulation of neuron apoptotic process (GO:0043523)                   | 243 | 6 | .33 | + | 18.16 | 8.80E-07 | 7.85E-05 |
| negative regulation of neuron apoptotic process (GO:0043524)          | 162 | 4 | .22 | + | 18.16 | 7.13E-05 | 3.19E-03 |
| negative regulation of protein kinase activity (GO:0006469)           | 164 | 4 | .22 | + | 17.94 | 7.47E-05 | 3.30E-03 |
| positive regulation of peptidyl-tyrosine phosphorylation (GO:0050731) | 164 | 4 | .22 | + | 17.94 | 7.47E-05 | 3.29E-03 |
| regulation of mononuclear cell migration (GO:0071675)                 | 124 | 3 | .17 | + | 17.79 | 6.68E-04 | 1.99E-02 |
| regulation of chromosome organization (GO:0033044)                    | 249 | 6 | .34 | + | 17.72 | 1.01E-06 | 8.91E-05 |
| regulation of endothelial cell migration (GO:0010594)                 | 168 | 4 | .23 | + | 17.51 | 8.19E-05 | 3.58E-03 |
| positive regulation of T cell activation (GO:0050870)                 | 253 | 6 | .34 | + | 17.44 | 1.11E-06 | 9.59E-05 |
| positive regulation of ERK1 and ERK2 cascade (GO:0070374)             | 211 | 5 | .29 | + | 17.43 | 9.72E-06 | 6.39E-04 |
| regulation of T cell activation (GO:0050863)                          | 380 | 9 | .52 | + | 17.42 | 1.39E-09 | 3.31E-07 |
| positive regulation of transmembrane transport (GO:0034764)           | 213 | 5 | .29 | + | 17.26 | 1.02E-05 | 6.62E-04 |
| mammary gland development (GO:0030879)                                | 128 | 3 | .17 | + | 17.24 | 7.31E-04 | 2.15E-02 |
| myelination (GO:0042552)                                              | 128 | 3 | .17 | + | 17.24 | 7.31E-04 | 2.15E-02 |
| regulation of myeloid leukocyte differentiation (GO:0002761)          | 128 | 3 | .17 | + | 17.24 | 7.31E-04 | 2.15E-02 |

|                                                                       |     |    |     |   |       |          |          |
|-----------------------------------------------------------------------|-----|----|-----|---|-------|----------|----------|
| regulation of DNA repair (GO:0006282)                                 | 214 | 5  | .29 | + | 17.18 | 1.04E-05 | 6.74E-04 |
| positive regulation of protein kinase activity (GO:0045860)           | 257 | 6  | .35 | + | 17.17 | 1.21E-06 | 1.04E-04 |
| gland development (GO:0048732)                                        | 430 | 10 | .58 | + | 17.10 | 1.65E-10 | 5.57E-08 |
| regulation of protein binding (GO:0043393)                            | 129 | 3  | .18 | + | 17.10 | 7.47E-04 | 2.18E-02 |
| regulation of canonical Wnt signaling pathway (GO:0060828)            | 259 | 6  | .35 | + | 17.04 | 1.27E-06 | 1.08E-04 |
| respiratory system development (GO:0060541)                           | 216 | 5  | .29 | + | 17.02 | 1.09E-05 | 7.02E-04 |
| regulation of macroautophagy (GO:0016241)                             | 173 | 4  | .24 | + | 17.00 | 9.15E-05 | 3.91E-03 |
| positive regulation of DNA metabolic process (GO:0051054)             | 303 | 7  | .41 | + | 16.99 | 1.46E-07 | 1.68E-05 |
| ensheathment of neurons (GO:0007272)                                  | 130 | 3  | .18 | + | 16.97 | 7.64E-04 | 2.21E-02 |
| cellular response to reactive oxygen species (GO:0034614)             | 130 | 3  | .18 | + | 16.97 | 7.64E-04 | 2.20E-02 |
| axon ensheathment (GO:0008366)                                        | 130 | 3  | .18 | + | 16.97 | 7.64E-04 | 2.20E-02 |
| positive regulation of kinase activity (GO:0033674)                   | 304 | 7  | .41 | + | 16.93 | 1.50E-07 | 1.69E-05 |
| negative regulation of kinase activity (GO:0033673)                   | 175 | 4  | .24 | + | 16.81 | 9.55E-05 | 4.07E-03 |
| positive regulation of supramolecular fiber organization (GO:1902905) | 175 | 4  | .24 | + | 16.81 | 9.55E-05 | 4.06E-03 |
| digestive tract development (GO:0048565)                              | 133 | 3  | .18 | + | 16.59 | 8.15E-04 | 2.30E-02 |
| regulation of peptidyl-tyrosine phosphorylation (GO:0050730)          | 222 | 5  | .30 | + | 16.56 | 1.24E-05 | 7.85E-04 |

|                                                                               |     |   |     |   |       |          |          |
|-------------------------------------------------------------------------------|-----|---|-----|---|-------|----------|----------|
| positive regulation of lymphocyte differentiation (GO:0045621)                | 134 | 3 | .18 | + | 16.46 | 8.32E-04 | 2.35E-02 |
| epithelial tube formation (GO:0072175)                                        | 134 | 3 | .18 | + | 16.46 | 8.32E-04 | 2.34E-02 |
| negative regulation of epithelial cell proliferation (GO:0050680)             | 136 | 3 | .18 | + | 16.22 | 8.68E-04 | 2.43E-02 |
| regulation of hemopoiesis (GO:1903706)                                        | 409 | 9 | .56 | + | 16.18 | 2.61E-09 | 5.84E-07 |
| branching morphogenesis of an epithelial tube (GO:0048754)                    | 137 | 3 | .19 | + | 16.10 | 8.86E-04 | 2.47E-02 |
| regulation of epithelial cell migration (GO:0010632)                          | 229 | 5 | .31 | + | 16.06 | 1.43E-05 | 8.77E-04 |
| positive regulation of leukocyte cell-cell adhesion (GO:1903039)              | 276 | 6 | .38 | + | 15.99 | 1.81E-06 | 1.50E-04 |
| positive regulation of lymphocyte activation (GO:0051251)                     | 328 | 7 | .45 | + | 15.70 | 2.48E-07 | 2.62E-05 |
| transmembrane receptor protein tyrosine kinase signaling pathway (GO:0007169) | 422 | 9 | .57 | + | 15.68 | 3.40E-09 | 7.21E-07 |
| positive regulation of transferase activity (GO:0051347)                      | 376 | 8 | .51 | + | 15.65 | 3.02E-08 | 4.38E-06 |
| positive regulation of synaptic transmission (GO:0050806)                     | 141 | 3 | .19 | + | 15.65 | 9.61E-04 | 2.65E-02 |
| developmental growth involved in morphogenesis (GO:0060560)                   | 141 | 3 | .19 | + | 15.65 | 9.61E-04 | 2.64E-02 |
| positive regulation of leukocyte differentiation (GO:1902107)                 | 189 | 4 | .26 | + | 15.56 | 1.28E-04 | 5.19E-03 |

|                                                                |     |   |     |   |       |          |          |
|----------------------------------------------------------------|-----|---|-----|---|-------|----------|----------|
| negative regulation of cell growth (GO:0030308)                | 189 | 4 | .26 | + | 15.56 | 1.28E-04 | 5.18E-03 |
| positive regulation of hemopoiesis (GO:1903708)                | 189 | 4 | .26 | + | 15.56 | 1.28E-04 | 5.17E-03 |
| regulation of apoptotic signaling pathway (GO:2001233)         | 381 | 8 | .52 | + | 15.44 | 3.34E-08 | 4.75E-06 |
| regulation of mitotic cell cycle phase transition (GO:1901990) | 334 | 7 | .45 | + | 15.41 | 2.79E-07 | 2.90E-05 |
| regulation of binding (GO:0051098)                             | 240 | 5 | .33 | + | 15.32 | 1.79E-05 | 1.05E-03 |
| digestive system development (GO:0055123)                      | 145 | 3 | .20 | + | 15.22 | 1.04E-03 | 2.81E-02 |
| protein-containing complex disassembly (GO:0032984)            | 146 | 3 | .20 | + | 15.11 | 1.06E-03 | 2.85E-02 |
| positive regulation of chemotaxis (GO:0050921)                 | 146 | 3 | .20 | + | 15.11 | 1.06E-03 | 2.85E-02 |
| tube formation (GO:0035148)                                    | 147 | 3 | .20 | + | 15.01 | 1.08E-03 | 2.89E-02 |
| positive regulation of neurogenesis (GO:0050769)               | 246 | 5 | .33 | + | 14.95 | 2.01E-05 | 1.15E-03 |
| lymphocyte differentiation (GO:0030098)                        | 296 | 6 | .40 | + | 14.91 | 2.70E-06 | 2.12E-04 |
| regulation of protein ubiquitination (GO:0031396)              | 198 | 4 | .27 | + | 14.86 | 1.52E-04 | 6.01E-03 |
| morphogenesis of embryonic epithelium (GO:0016331)             | 149 | 3 | .20 | + | 14.81 | 1.12E-03 | 2.97E-02 |
| ameboidal-type cell migration (GO:0001667)                     | 200 | 4 | .27 | + | 14.71 | 1.58E-04 | 6.23E-03 |
| regulation of protein localization to nucleus (GO:1900180)     | 150 | 3 | .20 | + | 14.71 | 1.15E-03 | 3.01E-02 |
| regulation of mitochondrion organization (GO:0010821)          | 150 | 3 | .20 | + | 14.71 | 1.15E-03 | 3.00E-02 |

|                                                                                 |     |    |     |   |       |          |          |
|---------------------------------------------------------------------------------|-----|----|-----|---|-------|----------|----------|
| immune response-activating cell surface receptor signaling pathway (GO:0002429) | 250 | 5  | .34 | + | 14.71 | 2.17E-05 | 1.23E-03 |
| regulation of lymphocyte activation (GO:0051249)                                | 502 | 10 | .68 | + | 14.65 | 7.17E-10 | 1.82E-07 |
| placenta development (GO:0001890)                                               | 151 | 3  | .21 | + | 14.61 | 1.17E-03 | 3.03E-02 |
| regulation of cold-induced thermogenesis (GO:0120161)                           | 151 | 3  | .21 | + | 14.61 | 1.17E-03 | 3.02E-02 |
| positive regulation of cell development (GO:0010720)                            | 453 | 9  | .62 | + | 14.61 | 6.23E-09 | 1.17E-06 |
| regulation of synaptic plasticity (GO:0048167)                                  | 203 | 4  | .28 | + | 14.49 | 1.67E-04 | 6.49E-03 |
| regulation of autophagy (GO:0010506)                                            | 357 | 7  | .49 | + | 14.42 | 4.34E-07 | 4.32E-05 |
| positive regulation of leukocyte activation (GO:0002696)                        | 360 | 7  | .49 | + | 14.30 | 4.58E-07 | 4.51E-05 |
| response to UV (GO:0009411)                                                     | 156 | 3  | .21 | + | 14.14 | 1.28E-03 | 3.22E-02 |
| protein autophosphorylation (GO:0046777)                                        | 156 | 3  | .21 | + | 14.14 | 1.28E-03 | 3.22E-02 |
| learning (GO:0007612)                                                           | 156 | 3  | .21 | + | 14.14 | 1.28E-03 | 3.21E-02 |
| regulation of axonogenesis (GO:0050770)                                         | 158 | 3  | .21 | + | 13.96 | 1.33E-03 | 3.32E-02 |
| phagocytosis (GO:0006909)                                                       | 159 | 3  | .22 | + | 13.88 | 1.35E-03 | 3.35E-02 |
| positive regulation of neuron projection development (GO:0010976)               | 159 | 3  | .22 | + | 13.88 | 1.35E-03 | 3.34E-02 |
| regulation of leukocyte cell-cell adhesion (GO:1903037)                         | 371 | 7  | .50 | + | 13.88 | 5.59E-07 | 5.39E-05 |
| negative regulation of transferase                                              | 214 | 4  | .29 | + | 13.75 | 2.04E-04 | 7.73E-03 |

|                                                                                              |     |    |     |   |       |              |              |
|----------------------------------------------------------------------------------------------|-----|----|-----|---|-------|--------------|--------------|
| activity<br>(GO:0051348)                                                                     |     |    |     |   |       |              |              |
| hindbrain<br>development<br>(GO:0030902)                                                     | 161 | 3  | .22 | + | 13.70 | 1.40E<br>-03 | 3.45E<br>-02 |
| positive regulation<br>of cell activation<br>(GO:0050867)                                    | 378 | 7  | .51 | + | 13.62 | 6.32E<br>-07 | 5.99E<br>-05 |
| positive regulation<br>of cell-cell adhesion<br>(GO:0022409)                                 | 325 | 6  | .44 | + | 13.58 | 4.57E<br>-06 | 3.29E<br>-04 |
| regulation of cell<br>cycle phase<br>transition<br>(GO:1901987)                              | 434 | 8  | .59 | + | 13.56 | 8.93E<br>-08 | 1.13E<br>-05 |
| response to insulin<br>(GO:0032868)                                                          | 217 | 4  | .30 | + | 13.56 | 2.15E<br>-04 | 8.09E<br>-03 |
| regulation of mitotic<br>cell cycle<br>(GO:0007346)                                          | 498 | 9  | .68 | + | 13.29 | 1.39E<br>-08 | 2.34E<br>-06 |
| morphogenesis of a<br>branching<br>epithelium<br>(GO:0061138)                                | 166 | 3  | .23 | + | 13.29 | 1.52E<br>-03 | 3.69E<br>-02 |
| anatomical structure<br>homeostasis<br>(GO:0060249)                                          | 224 | 4  | .30 | + | 13.13 | 2.42E<br>-04 | 9.00E<br>-03 |
| tissue homeostasis<br>(GO:0001894)                                                           | 224 | 4  | .30 | + | 13.13 | 2.42E<br>-04 | 8.97E<br>-03 |
| homeostasis of<br>number of cells<br>(GO:0048872)                                            | 282 | 5  | .38 | + | 13.04 | 3.81E<br>-05 | 1.92E<br>-03 |
| mononuclear cell<br>differentiation<br>(GO:1903131)                                          | 339 | 6  | .46 | + | 13.02 | 5.80E<br>-06 | 4.11E<br>-04 |
| immune response-<br>regulating cell<br>surface receptor<br>signaling pathway<br>(GO:0002768) | 283 | 5  | .38 | + | 12.99 | 3.88E<br>-05 | 1.94E<br>-03 |
| regulation of<br>leukocyte activation<br>(GO:0002694)                                        | 566 | 10 | .77 | + | 12.99 | 2.23E<br>-09 | 5.16E<br>-07 |
| regulation of cell<br>activation<br>(GO:0050865)                                             | 623 | 11 | .85 | + | 12.99 | 2.84E<br>-10 | 8.18E<br>-08 |
| regulation of cellular<br>response to stress<br>(GO:0080135)                                 | 511 | 9  | .69 | + | 12.95 | 1.74E<br>-08 | 2.78E<br>-06 |
| negative regulation<br>of protein                                                            | 284 | 5  | .39 | + | 12.95 | 3.94E<br>-05 | 1.97E<br>-03 |

|                                                                                                        |     |   |     |   |       |              |              |
|--------------------------------------------------------------------------------------------------------|-----|---|-----|---|-------|--------------|--------------|
| phosphorylation<br>(GO:0001933)                                                                        |     |   |     |   |       |              |              |
| mesenchymal cell<br>differentiation<br>(GO:0048762)                                                    | 172 | 3 | .23 | + | 12.83 | 1.68E<br>-03 | 4.05E<br>-02 |
| regulation of DNA<br>metabolic process<br>(GO:0051052)                                                 | 522 | 9 | .71 | + | 12.68 | 2.08E<br>-08 | 3.27E<br>-06 |
| regulation of protein<br>kinase activity<br>(GO:0045859)                                               | 464 | 8 | .63 | + | 12.68 | 1.48E<br>-07 | 1.68E<br>-05 |
| regulation of kinase<br>activity<br>(GO:0043549)                                                       | 527 | 9 | .72 | + | 12.56 | 2.25E<br>-08 | 3.51E<br>-06 |
| positive regulation<br>of nervous system<br>development<br>(GO:0051962)                                | 294 | 5 | .40 | + | 12.51 | 4.63E<br>-05 | 2.24E<br>-03 |
| morphogenesis of a<br>branching structure<br>(GO:0001763)                                              | 177 | 3 | .24 | + | 12.46 | 1.83E<br>-03 | 4.34E<br>-02 |
| response to reactive<br>oxygen species<br>(GO:0000302)                                                 | 177 | 3 | .24 | + | 12.46 | 1.83E<br>-03 | 4.33E<br>-02 |
| regulation of ERK1<br>and ERK2 cascade<br>(GO:0070372)                                                 | 296 | 5 | .40 | + | 12.42 | 4.78E<br>-05 | 2.31E<br>-03 |
| positive regulation<br>of cell projection<br>organization<br>(GO:0031346)                              | 358 | 6 | .49 | + | 12.33 | 7.88E<br>-06 | 5.36E<br>-04 |
| regulation of<br>epithelial cell<br>proliferation<br>(GO:0050678)                                      | 361 | 6 | .49 | + | 12.22 | 8.25E<br>-06 | 5.57E<br>-04 |
| regulation of protein<br>modification by<br>small protein<br>conjugation or<br>removal<br>(GO:1903320) | 241 | 4 | .33 | + | 12.21 | 3.18E<br>-04 | 1.13E<br>-02 |
| regulation of<br>synapse organization<br>(GO:0050807)                                                  | 242 | 4 | .33 | + | 12.16 | 3.23E<br>-04 | 1.14E<br>-02 |
| regulation of<br>intrinsic apoptotic<br>signaling pathway<br>(GO:2001242)                              | 182 | 3 | .25 | + | 12.12 | 1.97E<br>-03 | 4.60E<br>-02 |
| positive regulation<br>of cell adhesion<br>(GO:0045785)                                                | 486 | 8 | .66 | + | 12.11 | 2.09E<br>-07 | 2.26E<br>-05 |



|                                                                                               |     |    |     |   |       |          |          |
|-----------------------------------------------------------------------------------------------|-----|----|-----|---|-------|----------|----------|
| negative regulation of phosphorylation (GO:0042326)                                           | 304 | 5  | .41 | + | 12.10 | 5.42E-05 | 2.58E-03 |
| negative regulation of growth (GO:0045926)                                                    | 244 | 4  | .33 | + | 12.06 | 3.33E-04 | 1.16E-02 |
| vasculature development (GO:0001944)                                                          | 551 | 9  | .75 | + | 12.01 | 3.28E-08 | 4.72E-06 |
| regulation of phosphatidylinositol 3-kinase/protein kinase B signal transduction (GO:0051896) | 245 | 4  | .33 | + | 12.01 | 3.38E-04 | 1.18E-02 |
| positive regulation of cytoskeleton organization (GO:0051495)                                 | 184 | 3  | .25 | + | 11.99 | 2.03E-03 | 4.74E-02 |
| regulation of post-translational protein modification (GO:1901873)                            | 246 | 4  | .33 | + | 11.96 | 3.44E-04 | 1.19E-02 |
| cell-substrate adhesion (GO:0031589)                                                          | 185 | 3  | .25 | + | 11.93 | 2.07E-03 | 4.80E-02 |
| cellular response to peptide hormone stimulus (GO:0071375)                                    | 248 | 4  | .34 | + | 11.86 | 3.54E-04 | 1.22E-02 |
| regulation of synapse structure or activity (GO:0050803)                                      | 248 | 4  | .34 | + | 11.86 | 3.54E-04 | 1.22E-02 |
| positive regulation of phosphorylation (GO:0042327)                                           | 622 | 10 | .85 | + | 11.82 | 5.43E-09 | 1.06E-06 |
| response to growth factor (GO:0070848)                                                        | 506 | 8  | .69 | + | 11.63 | 2.83E-07 | 2.91E-05 |
| response to peptide hormone (GO:0043434)                                                      | 380 | 6  | .52 | + | 11.61 | 1.10E-05 | 7.05E-04 |
| response to light stimulus (GO:0009416)                                                       | 318 | 5  | .43 | + | 11.56 | 6.68E-05 | 3.05E-03 |
| positive regulation of cell cycle process (GO:0090068)                                        | 255 | 4  | .35 | + | 11.54 | 3.93E-04 | 1.32E-02 |
| regulation of cellular response to growth                                                     | 319 | 5  | .43 | + | 11.53 | 6.78E-05 | 3.09E-03 |

|                                                                                                                       |     |    |      |   |       |              |              |
|-----------------------------------------------------------------------------------------------------------------------|-----|----|------|---|-------|--------------|--------------|
| factor stimulus<br>(GO:0090287)                                                                                       |     |    |      |   |       |              |              |
| positive regulation<br>of protein<br>phosphorylation<br>(GO:0001934)                                                  | 576 | 9  | .78  | + | 11.49 | 4.78E<br>-08 | 6.56E<br>-06 |
| cell fate<br>commitment<br>(GO:0045165)                                                                               | 256 | 4  | .35  | + | 11.49 | 3.98E<br>-04 | 1.33E<br>-02 |
| regulation of<br>transferase activity<br>(GO:0051338)                                                                 | 640 | 10 | .87  | + | 11.49 | 7.10E<br>-09 | 1.32E<br>-06 |
| immune response-<br>activating signaling<br>pathway<br>(GO:0002757)                                                   | 321 | 5  | .44  | + | 11.46 | 6.98E<br>-05 | 3.15E<br>-03 |
| regulation of cell<br>development<br>(GO:0060284)                                                                     | 836 | 13 | 1.14 | + | 11.44 | 1.88E<br>-11 | 1.31E<br>-08 |
| T cell activation<br>(GO:0042110)                                                                                     | 322 | 5  | .44  | + | 11.42 | 7.08E<br>-05 | 3.19E<br>-03 |
| positive regulation<br>of cell cycle<br>(GO:0045787)                                                                  | 324 | 5  | .44  | + | 11.35 | 7.29E<br>-05 | 3.24E<br>-03 |
| regulation of<br>neurogenesis<br>(GO:0050767)                                                                         | 389 | 6  | .53  | + | 11.34 | 1.25E<br>-05 | 7.93E<br>-04 |
| regulation of<br>transmembrane<br>receptor protein<br>serine/threonine<br>kinase signaling<br>pathway<br>(GO:0090092) | 263 | 4  | .36  | + | 11.19 | 4.41E<br>-04 | 1.43E<br>-02 |
| regulation of protein<br>serine/threonine<br>kinase activity<br>(GO:0071900)                                          | 264 | 4  | .36  | + | 11.14 | 4.47E<br>-04 | 1.45E<br>-02 |
| blood vessel<br>development<br>(GO:0001568)                                                                           | 530 | 8  | .72  | + | 11.10 | 4.00E<br>-07 | 4.06E<br>-05 |
| regulation of<br>nervous system<br>development<br>(GO:0051960)                                                        | 464 | 7  | .63  | + | 11.09 | 2.42E<br>-06 | 1.92E<br>-04 |
| regulation of<br>leukocyte<br>proliferation<br>(GO:0070663)                                                           | 266 | 4  | .36  | + | 11.06 | 4.60E<br>-04 | 1.48E<br>-02 |

|                                                                  |     |    |      |   |       |          |          |
|------------------------------------------------------------------|-----|----|------|---|-------|----------|----------|
| positive regulation of cell differentiation (GO:0045597)         | 871 | 13 | 1.18 | + | 10.98 | 3.12E-11 | 1.76E-08 |
| regulation of actin filament organization (GO:0110053)           | 271 | 4  | .37  | + | 10.86 | 4.92E-04 | 1.58E-02 |
| multicellular organismal-level homeostasis (GO:0048871)          | 611 | 9  | .83  | + | 10.83 | 7.85E-08 | 1.01E-05 |
| enzyme-linked receptor protein signaling pathway (GO:0007167)    | 614 | 9  | .83  | + | 10.78 | 8.18E-08 | 1.05E-05 |
| negative regulation of protein modification process (GO:0031400) | 412 | 6  | .56  | + | 10.71 | 1.73E-05 | 1.02E-03 |
| cellular response to chemical stress (GO:0062197)                | 278 | 4  | .38  | + | 10.58 | 5.41E-04 | 1.71E-02 |
| regulation of cell-cell adhesion (GO:0022407)                    | 487 | 7  | .66  | + | 10.57 | 3.32E-06 | 2.54E-04 |
| positive regulation of phosphorus metabolic process (GO:0010562) | 700 | 10 | .95  | + | 10.51 | 1.65E-08 | 2.73E-06 |
| positive regulation of phosphate metabolic process (GO:0045937)  | 700 | 10 | .95  | + | 10.51 | 1.65E-08 | 2.70E-06 |
| learning or memory (GO:0007611)                                  | 280 | 4  | .38  | + | 10.51 | 5.56E-04 | 1.75E-02 |
| regulation of protein phosphorylation (GO:0001932)               | 913 | 13 | 1.24 | + | 10.47 | 5.56E-11 | 2.73E-08 |
| negative regulation of cell development (GO:0010721)             | 281 | 4  | .38  | + | 10.47 | 5.63E-04 | 1.77E-02 |
| protein phosphorylation (GO:0006468)                             | 492 | 7  | .67  | + | 10.46 | 3.55E-06 | 2.64E-04 |
| regulation of cell growth (GO:0001558)                           | 423 | 6  | .58  | + | 10.43 | 2.00E-05 | 1.15E-03 |
| regulation of phosphorylation (GO:0042325)                       | 989 | 14 | 1.34 | + | 10.41 | 8.04E-12 | 7.21E-09 |

|                                                                  |     |    |      |   |       |          |          |
|------------------------------------------------------------------|-----|----|------|---|-------|----------|----------|
| muscle cell differentiation (GO:0042692)                         | 283 | 4  | .38  | + | 10.39 | 5.78E-04 | 1.79E-02 |
| immune response-regulating signaling pathway (GO:0002764)        | 356 | 5  | .48  | + | 10.33 | 1.13E-04 | 4.69E-03 |
| skin development (GO:0043588)                                    | 285 | 4  | .39  | + | 10.32 | 5.93E-04 | 1.82E-02 |
| blood vessel morphogenesis (GO:0048514)                          | 431 | 6  | .59  | + | 10.24 | 2.22E-05 | 1.26E-03 |
| leukocyte differentiation (GO:0002521)                           | 432 | 6  | .59  | + | 10.21 | 2.25E-05 | 1.27E-03 |
| growth (GO:0040007)                                              | 432 | 6  | .59  | + | 10.21 | 2.25E-05 | 1.26E-03 |
| developmental growth (GO:0048589)                                | 432 | 6  | .59  | + | 10.21 | 2.25E-05 | 1.26E-03 |
| negative regulation of cell migration (GO:0030336)               | 288 | 4  | .39  | + | 10.21 | 6.17E-04 | 1.87E-02 |
| positive regulation of organelle organization (GO:0010638)       | 504 | 7  | .69  | + | 10.21 | 4.15E-06 | 3.04E-04 |
| regulation of cell cycle process (GO:0010564)                    | 726 | 10 | .99  | + | 10.13 | 2.31E-08 | 3.56E-06 |
| negative regulation of phosphate metabolic process (GO:0045936)  | 365 | 5  | .50  | + | 10.07 | 1.27E-04 | 5.16E-03 |
| cell population proliferation (GO:0008283)                       | 732 | 10 | 1.00 | + | 10.05 | 2.50E-08 | 3.81E-06 |
| negative regulation of phosphorus metabolic process (GO:0010563) | 366 | 5  | .50  | + | 10.05 | 1.28E-04 | 5.16E-03 |
| negative regulation of cell motility (GO:2000146)                | 303 | 4  | .41  | + | 9.71  | 7.44E-04 | 2.18E-02 |
| regulation of neuron projection development (GO:0010975)         | 459 | 6  | .62  | + | 9.61  | 3.15E-05 | 1.67E-03 |
| regulation of actin filament-based                               | 383 | 5  | .52  | + | 9.60  | 1.58E-04 | 6.21E-03 |

|                                                                               |      |    |      |   |      |              |              |
|-------------------------------------------------------------------------------|------|----|------|---|------|--------------|--------------|
| process<br>(GO:0032970)                                                       |      |    |      |   |      |              |              |
| embryonic organ<br>development<br>(GO:0048568)                                | 460  | 6  | .63  | + | 9.59 | 3.19E<br>-05 | 1.68E<br>-03 |
| response to peptide<br>(GO:1901652)                                           | 462  | 6  | .63  | + | 9.55 | 3.26E<br>-05 | 1.71E<br>-03 |
| cellular response to<br>peptide<br>(GO:1901653)                               | 308  | 4  | .42  | + | 9.55 | 7.90E<br>-04 | 2.26E<br>-02 |
| regulation of small<br>GTPase mediated<br>signal transduction<br>(GO:0051056) | 308  | 4  | .42  | + | 9.55 | 7.90E<br>-04 | 2.26E<br>-02 |
| activation of<br>immune response<br>(GO:0002253)                              | 387  | 5  | .53  | + | 9.50 | 1.66E<br>-04 | 6.45E<br>-03 |
| positive regulation<br>of cell migration<br>(GO:0030335)                      | 543  | 7  | .74  | + | 9.48 | 6.73E<br>-06 | 4.68E<br>-04 |
| positive regulation<br>of MAPK cascade<br>(GO:0043410)                        | 467  | 6  | .64  | + | 9.45 | 3.46E<br>-05 | 1.77E<br>-03 |
| cellular response to<br>organonitrogen<br>compound<br>(GO:0071417)            | 547  | 7  | .74  | + | 9.41 | 7.05E<br>-06 | 4.86E<br>-04 |
| regulation of<br>supramolecular fiber<br>organization<br>(GO:1902903)         | 391  | 5  | .53  | + | 9.40 | 1.74E<br>-04 | 6.73E<br>-03 |
| regulation of cell<br>adhesion<br>(GO:0030155)                                | 789  | 10 | 1.07 | + | 9.32 | 5.02E<br>-08 | 6.77E<br>-06 |
| regulation of<br>organelle<br>organization<br>(GO:0033043)                    | 1185 | 15 | 1.61 | + | 9.31 | 4.99E<br>-12 | 5.43E<br>-09 |
| cellular response to<br>growth factor<br>stimulus<br>(GO:0071363)             | 475  | 6  | .65  | + | 9.29 | 3.80E<br>-05 | 1.92E<br>-03 |
| apoptotic signaling<br>pathway<br>(GO:0097190)                                | 317  | 4  | .43  | + | 9.28 | 8.79E<br>-04 | 2.46E<br>-02 |
| epithelial tube<br>morphogenesis<br>(GO:0060562)                              | 317  | 4  | .43  | + | 9.28 | 8.79E<br>-04 | 2.45E<br>-02 |
| transcription by RNA<br>polymerase II<br>(GO:0006366)                         | 400  | 5  | .54  | + | 9.19 | 1.93E<br>-04 | 7.36E<br>-03 |

|                                                          |      |    |      |   |      |          |          |
|----------------------------------------------------------|------|----|------|---|------|----------|----------|
| response to lipopolysaccharide (GO:0032496)              | 321  | 4  | .44  | + | 9.16 | 9.20E-04 | 2.55E-02 |
| cellular response to abiotic stimulus (GO:0071214)       | 322  | 4  | .44  | + | 9.14 | 9.31E-04 | 2.57E-02 |
| cellular response to environmental stimulus (GO:0104004) | 322  | 4  | .44  | + | 9.14 | 9.31E-04 | 2.56E-02 |
| lymphocyte activation (GO:0046649)                       | 487  | 6  | .66  | + | 9.06 | 4.36E-05 | 2.14E-03 |
| cognition (GO:0050890)                                   | 325  | 4  | .44  | + | 9.05 | 9.63E-04 | 2.64E-02 |
| regulation of MAPK cascade (GO:0043408)                  | 651  | 8  | .89  | + | 9.04 | 1.84E-06 | 1.52E-04 |
| positive regulation of cell motility (GO:2000147)        | 570  | 7  | .78  | + | 9.03 | 9.20E-06 | 6.09E-04 |
| regulation of phosphate metabolic process (GO:0019220)   | 1150 | 14 | 1.56 | + | 8.95 | 5.88E-11 | 2.80E-08 |
| regulation of phosphorus metabolic process (GO:0051174)  | 1151 | 14 | 1.57 | + | 8.95 | 5.95E-11 | 2.67E-08 |
| tube development (GO:0035295)                            | 905  | 11 | 1.23 | + | 8.94 | 1.34E-08 | 2.27E-06 |
| regulation of cell differentiation (GO:0045595)          | 1566 | 19 | 2.13 | + | 8.92 | 2.15E-15 | 3.27E-11 |
| phosphorylation (GO:0016310)                             | 745  | 9  | 1.01 | + | 8.88 | 4.12E-07 | 4.16E-05 |
| positive regulation of locomotion (GO:0040017)           | 585  | 7  | .80  | + | 8.80 | 1.09E-05 | 6.99E-04 |
| negative regulation of cell differentiation (GO:0045596) | 670  | 8  | .91  | + | 8.78 | 2.27E-06 | 1.83E-04 |
| regulation of protein stability (GO:0031647)             | 335  | 4  | .46  | + | 8.78 | 1.08E-03 | 2.88E-02 |
| regulation of cell cycle (GO:0051726)                    | 1090 | 13 | 1.48 | + | 8.77 | 4.83E-10 | 1.29E-07 |
| circulatory system development (GO:0072359)              | 928  | 11 | 1.26 | + | 8.72 | 1.73E-08 | 2.81E-06 |

|                                                                  |      |    |      |   |      |          |          |
|------------------------------------------------------------------|------|----|------|---|------|----------|----------|
| negative regulation of locomotion (GO:0040013)                   | 338  | 4  | .46  | + | 8.70 | 1.11E-03 | 2.95E-02 |
| response to molecule of bacterial origin (GO:0002237)            | 339  | 4  | .46  | + | 8.68 | 1.12E-03 | 2.97E-02 |
| positive regulation of protein modification process (GO:0031401) | 763  | 9  | 1.04 | + | 8.67 | 5.02E-07 | 4.91E-05 |
| angiogenesis (GO:0001525)                                        | 340  | 4  | .46  | + | 8.65 | 1.14E-03 | 2.99E-02 |
| regulation of cell migration (GO:0030334)                        | 940  | 11 | 1.28 | + | 8.61 | 1.98E-08 | 3.14E-06 |
| regulation of actin cytoskeleton organization (GO:0032956)       | 342  | 4  | .47  | + | 8.60 | 1.16E-03 | 3.02E-02 |
| tube morphogenesis (GO:0035239)                                  | 684  | 8  | .93  | + | 8.60 | 2.65E-06 | 2.09E-04 |
| response to radiation (GO:0009314)                               | 428  | 5  | .58  | + | 8.59 | 2.63E-04 | 9.60E-03 |
| chemotaxis (GO:0006935)                                          | 345  | 4  | .47  | + | 8.53 | 1.20E-03 | 3.09E-02 |
| negative regulation of organelle organization (GO:0010639)       | 345  | 4  | .47  | + | 8.53 | 1.20E-03 | 3.09E-02 |
| epidermis development (GO:0008544)                               | 346  | 4  | .47  | + | 8.50 | 1.21E-03 | 3.11E-02 |
| taxis (GO:0042330)                                               | 347  | 4  | .47  | + | 8.48 | 1.22E-03 | 3.10E-02 |
| regulation of protein modification process (GO:0031399)          | 1230 | 14 | 1.67 | + | 8.37 | 1.42E-10 | 4.93E-08 |
| response to inorganic substance (GO:0010035)                     | 528  | 6  | .72  | + | 8.36 | 6.80E-05 | 3.08E-03 |
| positive regulation of catalytic activity (GO:0043085)           | 884  | 10 | 1.20 | + | 8.32 | 1.44E-07 | 1.66E-05 |
| chromatin remodeling (GO:0006338)                                | 621  | 7  | .84  | + | 8.29 | 1.59E-05 | 9.64E-04 |
| regulation of growth (GO:0040008)                                | 621  | 7  | .84  | + | 8.29 | 1.59E-05 | 9.60E-04 |
| negative regulation of cell population                           | 710  | 8  | .97  | + | 8.29 | 3.48E-06 | 2.60E-04 |

|                                                                       |      |    |      |   |      |          |          |
|-----------------------------------------------------------------------|------|----|------|---|------|----------|----------|
| proliferation (GO:0008285)                                            |      |    |      |   |      |          |          |
| positive regulation of developmental process (GO:0051094)             | 1337 | 15 | 1.82 | + | 8.25 | 2.74E-11 | 1.67E-08 |
| cellular response to nitrogen compound (GO:1901699)                   | 624  | 7  | .85  | + | 8.25 | 1.64E-05 | 9.82E-04 |
| germ cell development (GO:0007281)                                    | 362  | 4  | .49  | + | 8.13 | 1.43E-03 | 3.49E-02 |
| response to metal ion (GO:0010038)                                    | 363  | 4  | .49  | + | 8.10 | 1.44E-03 | 3.52E-02 |
| regulation of cell motility (GO:2000145)                              | 1000 | 11 | 1.36 | + | 8.09 | 3.71E-08 | 5.19E-06 |
| positive regulation of immune system process (GO:0002684)             | 1000 | 11 | 1.36 | + | 8.09 | 3.71E-08 | 5.14E-06 |
| negative regulation of intracellular signal transduction (GO:1902532) | 547  | 6  | .74  | + | 8.07 | 8.25E-05 | 3.58E-03 |
| programmed cell death (GO:0012501)                                    | 1094 | 12 | 1.49 | + | 8.07 | 7.31E-09 | 1.34E-06 |
| regulation of DNA-binding transcription factor activity (GO:0051090)  | 366  | 4  | .50  | + | 8.04 | 1.49E-03 | 3.62E-02 |
| cell death (GO:0008219)                                               | 1098 | 12 | 1.49 | + | 8.04 | 7.61E-09 | 1.35E-06 |
| RNA biosynthetic process (GO:0032774)                                 | 551  | 6  | .75  | + | 8.01 | 8.58E-05 | 3.71E-03 |
| cell activation (GO:0001775)                                          | 736  | 8  | 1.00 | + | 7.99 | 4.53E-06 | 3.27E-04 |
| locomotion (GO:0040011)                                               | 368  | 4  | .50  | + | 7.99 | 1.52E-03 | 3.68E-02 |
| negative regulation of programmed cell death (GO:0043069)             | 921  | 10 | 1.25 | + | 7.99 | 2.10E-07 | 2.25E-05 |
| intracellular signaling cassette (GO:0141124)                         | 831  | 9  | 1.13 | + | 7.96 | 1.02E-06 | 8.91E-05 |
| cellular response to organic cyclic compound (GO:0071407)             | 466  | 5  | .63  | + | 7.89 | 3.87E-04 | 1.31E-02 |



|                                                                                     |      |    |      |   |      |              |              |
|-------------------------------------------------------------------------------------|------|----|------|---|------|--------------|--------------|
| synaptic signaling<br>(GO:0099536)                                                  | 467  | 5  | .64  | + | 7.87 | 3.91E<br>-04 | 1.32E<br>-02 |
| regulation of multicellular organismal development<br>(GO:2000026)                  | 1404 | 15 | 1.91 | + | 7.86 | 5.45E<br>-11 | 2.77E<br>-08 |
| chromosome organization<br>(GO:0051276)                                             | 468  | 5  | .64  | + | 7.86 | 3.95E<br>-04 | 1.33E<br>-02 |
| regulation of transmembrane transport<br>(GO:0034762)                               | 468  | 5  | .64  | + | 7.86 | 3.95E<br>-04 | 1.32E<br>-02 |
| regulation of plasma membrane bounded cell projection organization<br>(GO:0120035)  | 656  | 7  | .89  | + | 7.85 | 2.26E<br>-05 | 1.26E<br>-03 |
| positive regulation of molecular function<br>(GO:0044093)                           | 1219 | 13 | 1.66 | + | 7.84 | 1.87E<br>-09 | 4.39E<br>-07 |
| cellular process involved in reproduction in multicellular organism<br>(GO:0022412) | 469  | 5  | .64  | + | 7.84 | 3.99E<br>-04 | 1.33E<br>-02 |
| heart development<br>(GO:0007507)                                                   | 566  | 6  | .77  | + | 7.80 | 9.94E<br>-05 | 4.17E<br>-03 |
| regulation of locomotion<br>(GO:0040012)                                            | 1042 | 11 | 1.42 | + | 7.76 | 5.63E<br>-08 | 7.53E<br>-06 |
| apoptotic process<br>(GO:0006915)                                                   | 1045 | 11 | 1.42 | + | 7.74 | 5.79E<br>-08 | 7.68E<br>-06 |
| positive regulation of cell population proliferation<br>(GO:0008284)                | 950  | 10 | 1.29 | + | 7.74 | 2.78E<br>-07 | 2.91E<br>-05 |
| regulation of cell projection organization<br>(GO:0031344)                          | 672  | 7  | .91  | + | 7.66 | 2.63E<br>-05 | 1.44E<br>-03 |
| positive regulation of transcription by RNA polymerase II<br>(GO:0045944)           | 1265 | 13 | 1.72 | + | 7.56 | 2.92E<br>-09 | 6.37E<br>-07 |
| response to hormone<br>(GO:0009725)                                                 | 785  | 8  | 1.07 | + | 7.49 | 7.24E<br>-06 | 4.97E<br>-04 |

|                                                                     |      |    |      |   |      |          |          |
|---------------------------------------------------------------------|------|----|------|---|------|----------|----------|
| regulation of cellular catabolic process (GO:0031329)               | 688  | 7  | .94  | + | 7.48 | 3.06E-05 | 1.64E-03 |
| regulation of cell population proliferation (GO:0042127)            | 1676 | 17 | 2.28 | + | 7.46 | 2.90E-12 | 3.69E-09 |
| positive regulation of protein localization (GO:1903829)            | 495  | 5  | .67  | + | 7.43 | 5.09E-04 | 1.62E-02 |
| negative regulation of apoptotic process (GO:0043066)               | 894  | 9  | 1.22 | + | 7.40 | 1.85E-06 | 1.52E-04 |
| hemopoiesis (GO:0030097)                                            | 699  | 7  | .95  | + | 7.36 | 3.38E-05 | 1.74E-03 |
| response to abiotic stimulus (GO:0009628)                           | 1112 | 11 | 1.51 | + | 7.27 | 1.08E-07 | 1.33E-05 |
| cellular response to hormone stimulus (GO:0032870)                  | 506  | 5  | .69  | + | 7.27 | 5.62E-04 | 1.77E-02 |
| in utero embryonic development (GO:0001701)                         | 405  | 4  | .55  | + | 7.26 | 2.14E-03 | 4.91E-02 |
| positive regulation of cellular component organization (GO:0051130) | 1118 | 11 | 1.52 | + | 7.24 | 1.14E-07 | 1.37E-05 |
| leukocyte activation (GO:0045321)                                   | 611  | 6  | .83  | + | 7.22 | 1.50E-04 | 5.95E-03 |
| negative regulation of developmental process (GO:0051093)           | 919  | 9  | 1.25 | + | 7.20 | 2.32E-06 | 1.86E-04 |
| muscle structure development (GO:0061061)                           | 517  | 5  | .70  | + | 7.11 | 6.19E-04 | 1.87E-02 |
| neurogenesis (GO:0022008)                                           | 1346 | 13 | 1.83 | + | 7.10 | 6.16E-09 | 1.17E-06 |
| regulation of cytoskeleton organization (GO:0051493)                | 522  | 5  | .71  | + | 7.04 | 6.46E-04 | 1.95E-02 |
| positive regulation of signal transduction (GO:0009967)             | 1568 | 15 | 2.13 | + | 7.04 | 2.55E-10 | 7.79E-08 |
| response to organonitrogen                                          | 945  | 9  | 1.28 | + | 7.00 | 2.91E-06 | 2.27E-04 |

|                                                                          |      |    |      |   |      |              |              |
|--------------------------------------------------------------------------|------|----|------|---|------|--------------|--------------|
| compound<br>(GO:0010243)                                                 |      |    |      |   |      |              |              |
| regulation of<br>anatomical structure<br>morphogenesis<br>(GO:0022603)   | 845  | 8  | 1.15 | + | 6.96 | 1.23E<br>-05 | 7.87E<br>-04 |
| peptidyl-amino acid<br>modification<br>(GO:0018193)                      | 529  | 5  | .72  | + | 6.95 | 6.86E<br>-04 | 2.03E<br>-02 |
| response to organic<br>cyclic compound<br>(GO:0014070)                   | 848  | 8  | 1.15 | + | 6.94 | 1.27E<br>-05 | 7.97E<br>-04 |
| response to lipid<br>(GO:0033993)                                        | 852  | 8  | 1.16 | + | 6.91 | 1.31E<br>-05 | 8.11E<br>-04 |
| positive regulation<br>of DNA-templated<br>transcription<br>(GO:0045893) | 1711 | 16 | 2.33 | + | 6.88 | 6.31E<br>-11 | 2.75E<br>-08 |
| positive regulation<br>of RNA biosynthetic<br>process<br>(GO:1902680)    | 1714 | 16 | 2.33 | + | 6.87 | 6.48E<br>-11 | 2.74E<br>-08 |
| epithelial cell<br>differentiation<br>(GO:0030855)                       | 643  | 6  | .87  | + | 6.86 | 1.98E<br>-04 | 7.53E<br>-03 |
| DNA-templated<br>transcription<br>(GO:0006351)                           | 539  | 5  | .73  | + | 6.82 | 7.46E<br>-04 | 2.18E<br>-02 |
| negative regulation<br>of signal<br>transduction<br>(GO:0009968)         | 1301 | 12 | 1.77 | + | 6.78 | 4.95E<br>-08 | 6.73E<br>-06 |
| response to<br>endogenous<br>stimulus<br>(GO:0009719)                    | 1411 | 13 | 1.92 | + | 6.78 | 1.08E<br>-08 | 1.87E<br>-06 |
| actin cytoskeleton<br>organization<br>(GO:0030036)                       | 547  | 5  | .74  | + | 6.72 | 7.97E<br>-04 | 2.27E<br>-02 |
| positive regulation<br>of cell<br>communication<br>(GO:0010647)          | 1754 | 16 | 2.39 | + | 6.71 | 9.13E<br>-11 | 3.66E<br>-08 |
| chromatin<br>organization<br>(GO:0006325)                                | 768  | 7  | 1.04 | + | 6.70 | 6.11E<br>-05 | 2.82E<br>-03 |
| positive regulation<br>of signaling<br>(GO:0023056)                      | 1756 | 16 | 2.39 | + | 6.70 | 9.29E<br>-11 | 3.54E<br>-08 |
| regulation of<br>immune system                                           | 1540 | 14 | 2.09 | + | 6.69 | 2.64E<br>-09 | 5.83E<br>-07 |

|                                                                                      |      |    |      |   |      |          |          |
|--------------------------------------------------------------------------------------|------|----|------|---|------|----------|----------|
| process (GO:0002682)                                                                 |      |    |      |   |      |          |          |
| positive regulation of multicellular organismal process (GO:0051240)                 | 1652 | 15 | 2.25 | + | 6.68 | 5.28E-10 | 1.36E-07 |
| regulation of response to stress (GO:0080134)                                        | 1356 | 12 | 1.84 | + | 6.51 | 7.78E-08 | 1.01E-05 |
| head development (GO:0060322)                                                        | 792  | 7  | 1.08 | + | 6.50 | 7.41E-05 | 3.28E-03 |
| positive regulation of nucleobase-containing compound metabolic process (GO:0045935) | 2059 | 18 | 2.80 | + | 6.43 | 5.18E-12 | 5.26E-09 |
| cellular response to endogenous stimulus (GO:0071495)                                | 1148 | 10 | 1.56 | + | 6.41 | 1.55E-06 | 1.31E-04 |
| gamete generation (GO:0007276)                                                       | 807  | 7  | 1.10 | + | 6.38 | 8.33E-05 | 3.61E-03 |
| positive regulation of RNA metabolic process (GO:0051254)                            | 1852 | 16 | 2.52 | + | 6.35 | 2.05E-10 | 6.64E-08 |
| positive regulation of intracellular signal transduction (GO:1902533)                | 1043 | 9  | 1.42 | + | 6.35 | 6.48E-06 | 4.53E-04 |
| cell morphogenesis (GO:0000902)                                                      | 696  | 6  | .95  | + | 6.34 | 3.02E-04 | 1.08E-02 |
| negative regulation of cell communication (GO:0010648)                               | 1397 | 12 | 1.90 | + | 6.32 | 1.08E-07 | 1.33E-05 |
| negative regulation of signaling (GO:0023057)                                        | 1398 | 12 | 1.90 | + | 6.31 | 1.08E-07 | 1.32E-05 |
| response to nitrogen compound (GO:1901698)                                           | 1053 | 9  | 1.43 | + | 6.29 | 7.00E-06 | 4.85E-04 |
| regulation of programmed cell death (GO:0043067)                                     | 1521 | 13 | 2.07 | + | 6.29 | 2.64E-08 | 3.98E-06 |
| positive regulation of response to stimulus (GO:0048584)                             | 2242 | 19 | 3.05 | + | 6.23 | 1.39E-12 | 1.93E-09 |

|                                                                       |      |    |      |   |      |          |          |
|-----------------------------------------------------------------------|------|----|------|---|------|----------|----------|
| homeostatic process (GO:0042592)                                      | 1430 | 12 | 1.94 | + | 6.17 | 1.39E-07 | 1.61E-05 |
| embryonic morphogenesis (GO:0048598)                                  | 596  | 5  | .81  | + | 6.17 | 1.17E-03 | 3.03E-02 |
| anatomical structure formation involved in morphogenesis (GO:0048646) | 971  | 8  | 1.32 | + | 6.06 | 3.33E-05 | 1.72E-03 |
| neuron differentiation (GO:0030182)                                   | 1095 | 9  | 1.49 | + | 6.04 | 9.58E-06 | 6.32E-04 |
| protein-DNA complex organization (GO:0071824)                         | 856  | 7  | 1.16 | + | 6.01 | 1.20E-04 | 4.95E-03 |
| regulation of developmental process (GO:0050793)                      | 2448 | 20 | 3.33 | + | 6.01 | 4.05E-13 | 8.81E-10 |
| regulation of apoptotic process (GO:0042981)                          | 1476 | 12 | 2.01 | + | 5.98 | 1.96E-07 | 2.13E-05 |
| actin filament-based process (GO:0030029)                             | 617  | 5  | .84  | + | 5.96 | 1.36E-03 | 3.36E-02 |
| positive regulation of protein metabolic process (GO:0051247)         | 1243 | 10 | 1.69 | + | 5.92 | 3.17E-06 | 2.44E-04 |
| regulation of cellular localization (GO:0060341)                      | 999  | 8  | 1.36 | + | 5.89 | 4.08E-05 | 2.02E-03 |
| cell cycle process (GO:0022402)                                       | 880  | 7  | 1.20 | + | 5.85 | 1.43E-04 | 5.66E-03 |
| behavior (GO:0007610)                                                 | 632  | 5  | .86  | + | 5.82 | 1.51E-03 | 3.67E-02 |
| regulation of catalytic activity (GO:0050790)                         | 1408 | 11 | 1.91 | + | 5.75 | 1.14E-06 | 9.78E-05 |
| cell migration (GO:0016477)                                           | 901  | 7  | 1.23 | + | 5.71 | 1.65E-04 | 6.42E-03 |
| cell surface receptor signaling pathway (GO:0007166)                  | 2079 | 16 | 2.83 | + | 5.66 | 1.13E-09 | 2.82E-07 |
| generation of neurons (GO:0048699)                                    | 1171 | 9  | 1.59 | + | 5.65 | 1.64E-05 | 9.83E-04 |
| multicellular organismal                                              | 913  | 7  | 1.24 | + | 5.64 | 1.79E-04 | 6.90E-03 |

|                                                                         |      |    |      |   |      |          |          |
|-------------------------------------------------------------------------|------|----|------|---|------|----------|----------|
| reproductive process (GO:0048609)                                       |      |    |      |   |      |          |          |
| positive regulation of immune response (GO:0050778)                     | 653  | 5  | .89  | + | 5.63 | 1.74E-03 | 4.17E-02 |
| regulation of immune response (GO:0050776)                              | 917  | 7  | 1.25 | + | 5.61 | 1.84E-04 | 7.07E-03 |
| positive regulation of gene expression (GO:0010628)                     | 1181 | 9  | 1.61 | + | 5.60 | 1.75E-05 | 1.03E-03 |
| chordate embryonic development (GO:0043009)                             | 664  | 5  | .90  | + | 5.54 | 1.87E-03 | 4.43E-02 |
| nucleobase-containing compound biosynthetic process (GO:0034654)        | 938  | 7  | 1.28 | + | 5.49 | 2.11E-04 | 7.98E-03 |
| negative regulation of protein metabolic process (GO:0051248)           | 810  | 6  | 1.10 | + | 5.45 | 6.73E-04 | 2.00E-02 |
| cell motility (GO:0048870)                                              | 1081 | 8  | 1.47 | + | 5.44 | 7.10E-05 | 3.19E-03 |
| regulation of cellular component organization (GO:0051128)              | 2442 | 18 | 3.32 | + | 5.42 | 9.06E-11 | 3.73E-08 |
| positive regulation of nitrogen compound metabolic process (GO:0051173) | 2998 | 22 | 4.08 | + | 5.40 | 6.35E-14 | 3.23E-10 |
| regulation of intracellular signal transduction (GO:1902531)            | 1781 | 13 | 2.42 | + | 5.37 | 1.69E-07 | 1.88E-05 |
| multicellular organism reproduction (GO:0032504)                        | 959  | 7  | 1.30 | + | 5.37 | 2.41E-04 | 9.00E-03 |
| embryo development ending in birth or egg hatching (GO:0009792)         | 685  | 5  | .93  | + | 5.37 | 2.14E-03 | 4.91E-02 |
| regulation of response to external stimulus (GO:0032101)                | 1098 | 8  | 1.49 | + | 5.36 | 7.92E-05 | 3.48E-03 |

|                                                                        |      |    |      |   |      |          |          |
|------------------------------------------------------------------------|------|----|------|---|------|----------|----------|
| regulation of signal transduction (GO:0009966)                         | 3021 | 22 | 4.11 | + | 5.36 | 7.46E-14 | 2.27E-10 |
| negative regulation of gene expression (GO:0010629)                    | 968  | 7  | 1.32 | + | 5.32 | 2.56E-04 | 9.36E-03 |
| negative regulation of response to stimulus (GO:0048585)               | 1664 | 12 | 2.26 | + | 5.30 | 7.09E-07 | 6.63E-05 |
| regulation of cellular component biogenesis (GO:0044087)               | 974  | 7  | 1.32 | + | 5.29 | 2.65E-04 | 9.65E-03 |
| cell development (GO:0048468)                                          | 2240 | 16 | 3.05 | + | 5.25 | 3.36E-09 | 7.21E-07 |
| cell cycle (GO:0007049)                                                | 1265 | 9  | 1.72 | + | 5.23 | 3.02E-05 | 1.63E-03 |
| positive regulation of cellular biosynthetic process (GO:0031328)      | 2686 | 19 | 3.65 | + | 5.20 | 3.46E-11 | 1.88E-08 |
| positive regulation of biosynthetic process (GO:0009891)               | 2707 | 19 | 3.68 | + | 5.16 | 3.97E-11 | 2.09E-08 |
| positive regulation of transport (GO:0051050)                          | 855  | 6  | 1.16 | + | 5.16 | 8.91E-04 | 2.48E-02 |
| developmental process involved in reproduction (GO:0003006)            | 1000 | 7  | 1.36 | + | 5.15 | 3.11E-04 | 1.11E-02 |
| central nervous system development (GO:0007417)                        | 1008 | 7  | 1.37 | + | 5.11 | 3.27E-04 | 1.15E-02 |
| positive regulation of macromolecule biosynthetic process (GO:0010557) | 2604 | 18 | 3.54 | + | 5.08 | 2.64E-10 | 7.73E-08 |
| heterocycle biosynthetic process (GO:0018130)                          | 1014 | 7  | 1.38 | + | 5.08 | 3.39E-04 | 1.18E-02 |
| positive regulation of cellular metabolic process (GO:0031325)         | 3341 | 23 | 4.54 | + | 5.06 | 3.07E-14 | 2.34E-10 |
| regulation of catabolic process (GO:0009894)                           | 1022 | 7  | 1.39 | + | 5.04 | 3.55E-04 | 1.22E-02 |

|                                                                     |      |    |      |   |      |          |          |
|---------------------------------------------------------------------|------|----|------|---|------|----------|----------|
| aromatic compound biosynthetic process (GO:0019438)                 | 1024 | 7  | 1.39 | + | 5.03 | 3.59E-04 | 1.23E-02 |
| regulation of transport (GO:0051049)                                | 1617 | 11 | 2.20 | + | 5.00 | 4.37E-06 | 3.19E-04 |
| nervous system development (GO:0007399)                             | 2207 | 15 | 3.00 | + | 5.00 | 2.79E-08 | 4.17E-06 |
| regulation of multicellular organismal process (GO:0051239)         | 2966 | 20 | 4.03 | + | 4.96 | 1.49E-11 | 1.19E-08 |
| regulation of protein localization (GO:0032880)                     | 891  | 6  | 1.21 | + | 4.95 | 1.10E-03 | 2.93E-02 |
| anatomical structure morphogenesis (GO:0009653)                     | 2239 | 15 | 3.04 | + | 4.93 | 3.39E-08 | 4.79E-06 |
| sexual reproduction (GO:0019953)                                    | 1052 | 7  | 1.43 | + | 4.89 | 4.23E-04 | 1.39E-02 |
| cellular response to oxygen-containing compound (GO:1901701)        | 1055 | 7  | 1.43 | + | 4.88 | 4.30E-04 | 1.40E-02 |
| embryo development (GO:0009790)                                     | 1059 | 7  | 1.44 | + | 4.86 | 4.40E-04 | 1.43E-02 |
| intracellular signal transduction (GO:0035556)                      | 1514 | 10 | 2.06 | + | 4.86 | 1.80E-05 | 1.06E-03 |
| regulation of protein metabolic process (GO:0051246)                | 2145 | 14 | 2.92 | + | 4.80 | 1.77E-07 | 1.94E-05 |
| regulation of molecular function (GO:0065009)                       | 2008 | 13 | 2.73 | + | 4.76 | 6.75E-07 | 6.35E-05 |
| positive regulation of macromolecule metabolic process (GO:0010604) | 3413 | 22 | 4.64 | + | 4.74 | 9.52E-13 | 1.81E-09 |
| cell-cell signaling (GO:0007267)                                    | 1086 | 7  | 1.48 | + | 4.74 | 5.11E-04 | 1.63E-02 |
| response to oxygen-containing compound (GO:1901700)                 | 1554 | 10 | 2.11 | + | 4.73 | 2.26E-05 | 1.26E-03 |
| regulation of localization (GO:0032879)                             | 2028 | 13 | 2.76 | + | 4.71 | 7.56E-07 | 6.94E-05 |



|                                                                |      |    |      |   |      |          |          |
|----------------------------------------------------------------|------|----|------|---|------|----------|----------|
| regulation of signaling (GO:0023051)                           | 3434 | 22 | 4.67 | + | 4.71 | 1.08E-12 | 1.83E-09 |
| regulation of cell communication (GO:0010646)                  | 3440 | 22 | 4.68 | + | 4.70 | 1.12E-12 | 1.71E-09 |
| epithelium development (GO:0060429)                            | 1111 | 7  | 1.51 | + | 4.63 | 5.86E-04 | 1.80E-02 |
| cellular response to stress (GO:0033554)                       | 1588 | 10 | 2.16 | + | 4.63 | 2.72E-05 | 1.48E-03 |
| positive regulation of metabolic process (GO:0009893)          | 3719 | 23 | 5.06 | + | 4.55 | 3.23E-13 | 8.20E-10 |
| regulation of transcription by RNA polymerase II (GO:0006357)  | 2603 | 16 | 3.54 | + | 4.52 | 2.95E-08 | 4.36E-06 |
| organic cyclic compound biosynthetic process (GO:1901362)      | 1150 | 7  | 1.56 | + | 4.48 | 7.19E-04 | 2.12E-02 |
| response to organic substance (GO:0010033)                     | 2467 | 15 | 3.35 | + | 4.47 | 1.24E-07 | 1.47E-05 |
| regulation of response to stimulus (GO:0048583)                | 3982 | 24 | 5.41 | + | 4.43 | 7.12E-14 | 2.71E-10 |
| animal organ morphogenesis (GO:0009887)                        | 996  | 6  | 1.35 | + | 4.43 | 1.95E-03 | 4.54E-02 |
| phosphate-containing compound metabolic process (GO:0006796)   | 1711 | 10 | 2.33 | + | 4.30 | 5.16E-05 | 2.47E-03 |
| negative regulation of cellular metabolic process (GO:0031324) | 2572 | 15 | 3.50 | + | 4.29 | 2.16E-07 | 2.31E-05 |
| regulation of DNA-templated transcription (GO:0006355)         | 3440 | 20 | 4.68 | + | 4.28 | 2.33E-10 | 7.25E-08 |
| cellular response to organic substance (GO:0071310)            | 1725 | 10 | 2.35 | + | 4.26 | 5.53E-05 | 2.61E-03 |
| regulation of RNA biosynthetic process (GO:2001141)            | 3459 | 20 | 4.70 | + | 4.25 | 2.58E-10 | 7.71E-08 |

|                                                                        |      |    |      |   |      |          |          |
|------------------------------------------------------------------------|------|----|------|---|------|----------|----------|
| phosphorus metabolic process (GO:0006793)                              | 1737 | 10 | 2.36 | + | 4.23 | 5.87E-05 | 2.74E-03 |
| negative regulation of metabolic process (GO:0009892)                  | 2828 | 16 | 3.85 | + | 4.16 | 9.61E-08 | 1.21E-05 |
| tissue development (GO:0009888)                                        | 1769 | 10 | 2.41 | + | 4.16 | 6.85E-05 | 3.10E-03 |
| immune system process (GO:0002376)                                     | 2316 | 13 | 3.15 | + | 4.13 | 3.41E-06 | 2.57E-04 |
| cytoskeleton organization (GO:0007010)                                 | 1255 | 7  | 1.71 | + | 4.10 | 1.20E-03 | 3.09E-02 |
| animal organ development (GO:0048513)                                  | 2869 | 16 | 3.90 | + | 4.10 | 1.18E-07 | 1.40E-05 |
| reproductive process (GO:0022414)                                      | 1470 | 8  | 2.00 | + | 4.00 | 5.81E-04 | 1.79E-02 |
| reproduction (GO:0000003)                                              | 1482 | 8  | 2.02 | + | 3.97 | 6.13E-04 | 1.86E-02 |
| negative regulation of macromolecule metabolic process (GO:0010605)    | 2609 | 14 | 3.55 | + | 3.95 | 1.96E-06 | 1.60E-04 |
| system development (GO:0048731)                                        | 3546 | 19 | 4.82 | + | 3.94 | 4.40E-09 | 8.94E-07 |
| negative regulation of macromolecule biosynthetic process (GO:0010558) | 2061 | 11 | 2.80 | + | 3.93 | 4.36E-05 | 2.14E-03 |
| regulation of RNA metabolic process (GO:0051252)                       | 3758 | 20 | 5.11 | + | 3.91 | 1.18E-09 | 2.90E-07 |
| negative regulation of cellular biosynthetic process (GO:0031327)      | 2113 | 11 | 2.87 | + | 3.83 | 5.48E-05 | 2.60E-03 |
| cell differentiation (GO:0030154)                                      | 3654 | 19 | 4.97 | + | 3.82 | 7.36E-09 | 1.34E-06 |
| cellular nitrogen compound biosynthetic process (GO:0044271)           | 1539 | 8  | 2.09 | + | 3.82 | 7.86E-04 | 2.26E-02 |
| cellular developmental process (GO:0048869)                            | 3657 | 19 | 4.97 | + | 3.82 | 7.46E-09 | 1.34E-06 |
| negative regulation of biosynthetic                                    | 2127 | 11 | 2.89 | + | 3.80 | 5.83E-05 | 2.73E-03 |

|                                                                                             |      |    |      |   |      |              |              |
|---------------------------------------------------------------------------------------------|------|----|------|---|------|--------------|--------------|
| process<br>(GO:0009890)                                                                     |      |    |      |   |      |              |              |
| cellular response to<br>chemical stimulus<br>(GO:0070887)                                   | 2389 | 12 | 3.25 | + | 3.69 | 3.05E<br>-05 | 1.64E<br>-03 |
| regulation of<br>nucleobase-<br>containing<br>compound<br>metabolic process<br>(GO:0019219) | 4061 | 20 | 5.52 | + | 3.62 | 4.84E<br>-09 | 9.70E<br>-07 |
| protein modification<br>process<br>(GO:0036211)                                             | 2069 | 10 | 2.81 | + | 3.55 | 2.53E<br>-04 | 9.29E<br>-03 |
| response to external<br>stimulus<br>(GO:0009605)                                            | 2290 | 11 | 3.11 | + | 3.53 | 1.15E<br>-04 | 4.74E<br>-03 |
| multicellular<br>organism<br>development<br>(GO:0007275)                                    | 3964 | 19 | 5.39 | + | 3.53 | 2.95E<br>-08 | 4.32E<br>-06 |
| response to<br>chemical<br>(GO:0042221)                                                     | 3780 | 18 | 5.14 | + | 3.50 | 1.13E<br>-07 | 1.36E<br>-05 |
| regulation of gene<br>expression<br>(GO:0010468)                                            | 4898 | 23 | 6.66 | + | 3.45 | 1.27E<br>-10 | 4.49E<br>-08 |
| regulation of cellular<br>biosynthetic process<br>(GO:0031326)                              | 5159 | 24 | 7.01 | + | 3.42 | 2.65E<br>-11 | 1.68E<br>-08 |
| protein localization<br>(GO:0008104)                                                        | 1944 | 9  | 2.64 | + | 3.40 | 7.84E<br>-04 | 2.26E<br>-02 |
| regulation of<br>biosynthetic process<br>(GO:0009889)                                       | 5190 | 24 | 7.06 | + | 3.40 | 3.04E<br>-11 | 1.78E<br>-08 |
| cellular<br>macromolecule<br>localization<br>(GO:0070727)                                   | 1951 | 9  | 2.65 | + | 3.39 | 8.05E<br>-04 | 2.29E<br>-02 |
| nucleic acid<br>metabolic process<br>(GO:0090304)                                           | 2180 | 10 | 2.96 | + | 3.37 | 3.87E<br>-04 | 1.31E<br>-02 |
| regulation of<br>macromolecule<br>biosynthetic process<br>(GO:0010556)                      | 5026 | 23 | 6.83 | + | 3.37 | 2.20E<br>-10 | 7.00E<br>-08 |
| negative regulation<br>of nitrogen<br>compound<br>metabolic process<br>(GO:0051172)         | 2188 | 10 | 2.98 | + | 3.36 | 3.99E<br>-04 | 1.33E<br>-02 |

|                                                                |      |    |      |   |      |          |          |
|----------------------------------------------------------------|------|----|------|---|------|----------|----------|
| regulation of nitrogen compound metabolic process (GO:0051171) | 5474 | 25 | 7.44 | + | 3.36 | 5.80E-12 | 5.53E-09 |
| regulation of biological quality (GO:0065008)                  | 2849 | 13 | 3.87 | + | 3.36 | 3.34E-05 | 1.72E-03 |
| negative regulation of cellular process (GO:0048523)           | 4848 | 22 | 6.59 | + | 3.34 | 1.28E-09 | 3.10E-07 |
| regulation of primary metabolic process (GO:0080090)           | 5622 | 25 | 7.64 | + | 3.27 | 1.10E-11 | 9.29E-09 |
| protein-containing complex organization (GO:0043933)           | 2027 | 9  | 2.76 | + | 3.27 | 1.06E-03 | 2.86E-02 |
| anatomical structure development (GO:0048856)                  | 5231 | 23 | 7.11 | + | 3.23 | 5.18E-10 | 1.36E-07 |
| response to stress (GO:0006950)                                | 3419 | 15 | 4.65 | + | 3.23 | 8.61E-06 | 5.78E-04 |
| positive regulation of cellular process (GO:0048522)           | 5707 | 25 | 7.76 | + | 3.22 | 1.57E-11 | 1.14E-08 |
| macromolecule modification (GO:0043412)                        | 2291 | 10 | 3.12 | + | 3.21 | 5.77E-04 | 1.79E-02 |
| regulation of cellular metabolic process (GO:0031323)          | 6054 | 26 | 8.23 | + | 3.16 | 3.03E-12 | 3.56E-09 |
| negative regulation of biological process (GO:0048519)         | 5208 | 22 | 7.08 | + | 3.11 | 5.42E-09 | 1.07E-06 |
| organelle organization (GO:0006996)                            | 3099 | 13 | 4.21 | + | 3.09 | 8.21E-05 | 3.58E-03 |
| regulation of macromolecule metabolic process (GO:0060255)     | 6033 | 25 | 8.20 | + | 3.05 | 5.89E-11 | 2.72E-08 |
| positive regulation of biological process (GO:0048518)         | 6210 | 25 | 8.44 | + | 2.96 | 1.17E-10 | 4.25E-08 |
| nucleobase-containing compound metabolic process (GO:0006139)  | 2743 | 11 | 3.73 | + | 2.95 | 5.68E-04 | 1.76E-02 |

|                                                               |       |    |       |   |      |          |          |
|---------------------------------------------------------------|-------|----|-------|---|------|----------|----------|
| developmental process<br>(GO:0032502)                         | 5739  | 23 | 7.80  | + | 2.95 | 3.71E-09 | 7.75E-07 |
| regulation of metabolic process<br>(GO:0019222)               | 6559  | 26 | 8.92  | + | 2.92 | 2.27E-11 | 1.50E-08 |
| heterocycle metabolic process<br>(GO:0046483)                 | 2931  | 11 | 3.99  | + | 2.76 | 1.00E-03 | 2.74E-02 |
| cellular aromatic compound metabolic process<br>(GO:0006725)  | 2971  | 11 | 4.04  | + | 2.72 | 1.13E-03 | 2.97E-02 |
| cellular nitrogen compound metabolic process<br>(GO:0034641)  | 3288  | 12 | 4.47  | + | 2.68 | 6.75E-04 | 2.01E-02 |
| multicellular organismal process<br>(GO:0032501)              | 6745  | 24 | 9.17  | + | 2.62 | 1.08E-08 | 1.85E-06 |
| signal transduction<br>(GO:0007165)                           | 4789  | 17 | 6.51  | + | 2.61 | 2.47E-05 | 1.36E-03 |
| cellular component organization<br>(GO:0016043)               | 5636  | 20 | 7.66  | + | 2.61 | 1.59E-06 | 1.33E-04 |
| cellular component organization or biogenesis<br>(GO:0071840) | 5852  | 20 | 7.96  | + | 2.51 | 3.02E-06 | 2.34E-04 |
| signaling<br>(GO:0023052)                                     | 5109  | 17 | 6.95  | + | 2.45 | 6.01E-05 | 2.79E-03 |
| cell communication<br>(GO:0007154)                            | 5262  | 17 | 7.16  | + | 2.38 | 8.98E-05 | 3.84E-03 |
| cellular response to stimulus<br>(GO:0051716)                 | 6448  | 20 | 8.77  | + | 2.28 | 1.54E-05 | 9.38E-04 |
| response to stimulus<br>(GO:0050896)                          | 8182  | 25 | 11.13 | + | 2.25 | 7.53E-08 | 9.90E-06 |
| macromolecule metabolic process<br>(GO:0043170)               | 5648  | 16 | 7.68  | + | 2.08 | 1.03E-03 | 2.79E-02 |
| cellular metabolic process<br>(GO:0044237)                    | 6416  | 18 | 8.72  | + | 2.06 | 3.43E-04 | 1.19E-02 |
| metabolic process<br>(GO:0008152)                             | 7979  | 21 | 10.85 | + | 1.94 | 1.28E-04 | 5.17E-03 |
| regulation of cellular process<br>(GO:0050794)                | 11167 | 27 | 15.18 | + | 1.78 | 1.07E-06 | 9.35E-05 |

|                                               |       |    |       |   |      |          |          |
|-----------------------------------------------|-------|----|-------|---|------|----------|----------|
| regulation of biological process (GO:0050789) | 11722 | 27 | 15.94 | + | 1.69 | 3.62E-06 | 2.68E-04 |
| biological regulation (GO:0065007)            | 12141 | 27 | 16.51 | + | 1.64 | 9.19E-06 | 6.11E-04 |
